# Supplementary material for: The evaluation of factors affecting antibody response after administration of the BNT162b2 vaccine: a prospective study in Japan
Source: PeerJ. 2021 Oct 13;9:e12316. doi: 10.7717/peerj.12316 (PMC8520395; doi:10.7717/peerj.12316)
Supplement: Supplemental Information 1 [file peerj-09-12316-s001.xlsx]

## Sheet: master sheet
No.	gender	age	Tall(m)	BW(kg)	BMI	Past medical history											Medication						Current smoking	past smoking history	drinking alchol	sleep duration				sleep quality	exercise time per day			outdoor activity days per week	Laboratory Test
						Chronic lung disease (COPD)	Chronic lung disease (non COPD)	Cardiac disease	Hypertension	Diabetes	Dyslipidemia	Liver disease	Chronic kidney disease	Autoimmune Disease	Immunodeficiency disease	Cancer	Antihypertensive drug	Antidiabetic drug	Antilipid drug	Anticoagulant drug / Antiplatelet drug	Immunosuppresive drug	Immunoglobulin	0:no 1:yes	0:no 1:yes	0:no 1:yes	≦ 2hours	3 〜 4hours	5 〜 7hours	8 〜 10hours	0:good, 1:disturbed	< 30min	30min 〜 1hour	> 1hour	1: no, 0: more than 1day	WBC	Hb	Ht	PLT	Alb	AST	ALT	γ-GT	Cr	CRP	BS	HbA1c	HDL-C	LDL-C	TG

1	female	44	162	78	29.7211	0	0	0	0	0	0	0	0	0	0	0	0	0	0	0	0	0	0	1	1	0	1	0	0	1	1	0	0	1	7.2	13	38.2	45.1	4.2	20	26	12	0.77	0.06	89	5.5	55	158	172
2	female	42	152	45	19.4771	0	0	0	0	0	0	0	0	0	0	0	0	0	0	0	0	0	1	0	0	0	0	1	0	1	1	0	0	0	8.1	13.1	37.4	24	4.4	19	14	12	0.51	0.15	82	5.4	74	100	73
3	female	49	159	72	28.4799	0	0	0	1	0	0	0	0	0	0	0	1	0	0	0	0	0	0	0	0	0	0	1	0	0	1	0	0	1	5.7	13.5	39.5	26.7	5	26	22	54	0.65	0.08	99	6.1	86	146	83
4	female	51	153	58	24.7768	0	0	0	1	0	0	0	0	0	0	0	1	0	1	0	0	0	1	0	1	0	0	1	0	1	1	0	0	1	7.3	8.5	28.2	57.2	4.4	11	9	12	0.56	0.03	98	5.7	47	108	112
5	female	35	156	62	25.4767	0	0	0	0	0	0	0	0	0	0	0	0	0	0	0	0	0	0	0	1	0	0	1	0	1	1	0	0	1	5.5	13.9	40.7	29.6	4.3	24	21	18	0.63	0.05	87	5.4	76	73	68
6	female	56	160	70	27.3438	0	0	0	0	0	0	0	0	0	0	0	0	0	0	0	0	0	0	0	1	0	1	0	0	1	1	0	0	0	6.7	13.1	38.5	32.8	4.5	16	17	17	0.52	0.06	95	6	59	182	203
7	female	53	162	64	24.3865	0	0	0	0	0	1	0	0	0	0	0	0	0	0	0	0	0	1	0	1	0	1	0	0	0	1	0	0	0	6.9	15	44.4	23.2	4.3	15	12	17	0.68	0.06	86	5.9	61	158	105
8	male	41	182	73	22.0384	0	0	0	0	0	0	0	0	0	0	0	0	0	0	0	0	0	1	0	0	0	0	1	0	1	0	0	1	0	6.5	13.6	40.5	22.7	2.9	12	12	14	0.7	0.01	93	5.7	74	87	49
9	female	50	161	78	30.0914	0	0	0	0	0	0	0	0	0	0	0	0	0	0	0	0	0	0	0	1	0	0	1	0	0	1	0	0	1	4.2	14.4	42	20.5	4.5	19	16	29	0.59	0.09	94	5.4	60	131	43
10	male	53	170	75	25.9516	0	0	0	1	0	0	0	0	0	0	0	0	0	0	0	0	0	0	0	1	0	0	1	0	0	1	0	0	1	6.4	16.2	45.6	19.9	4.7	22	31	46	0.78	0.02	106	6.1	63	96	90
11	male	52	168	53	18.7783	0	0	0	0	0	0	0	0	0	0	0	0	0	0	0	0	0	0	0	1	0	1	0	0	1	1	0	0	1	5.2	14.5	39.7	24.2	4.5	34	22	22	0.79	0.01	79	5.2	71	86	131
12	male	64	180	66	20.3704	0	0	1	0	0	0	0	0	0	0	0	1	0	0	0	0	0	0	1	1	0	0	1	0	1	1	0	0	0	3.7	10.5	30.9	10.5	4.1	29	24	43	0.91	0.02	94	6	68	85	43
13	male	58	166	52	18.8707	0	0	0	1	0	0	0	0	0	0	0	1	0	0	0	0	0	0	1	1	0	0	1	0	0	1	0	0	1	6.1	15.3	42.1	24.9	4.6	31	23	27	0.95	0.03	88	5.6	76	84	154
14	female	53	154	55	23.1911	0	0	0	0	0	0	0	0	0	0	0	0	0	0	0	0	0	0	1	1	0	0	1	0	1	1	0	0	1	4.2	13.5	40.3	29.8	4.1	21	15	22	0.63	0.05	103	5.9	92	161	130
15	female	54	149	66	29.7284	0	0	0	1	1	1	0	0	0	0	0	1	1	1	0	0	0	0	0	1	0	1	0	0	1	1	0	0	1	8.6	14.7	44.5	24.5	4.3	34	49	40	0.56	0.25	89	7.5	55	102	117
16	female	47	155	48	19.9792	0	0	0	0	0	0	0	0	0	0	0	0	0	0	0	0	0	0	0	1	0	0	1	0	0	1	0	0	1	5.9	13.4	39.8	26.4	4.4	20	13	12	0.75	0.03	99	5.6	69	88	42
17	female	51	164	54	20.0773	0	0	0	0	0	0	0	0	0	0	0	0	0	0	0	0	0	0	0	0	0	1	0	0	1	0	1	0	0	4.5	14.5	42.5	23.8	4.7	25	23	10	0.75	0.02	89	5.7	74	167	55
18	female	40	147	60	27.7662	0	1	0	0	0	0	0	0	0	0	0	0	0	0	0	0	0	0	0	0	0	1	0	0	0	1	0	0	1	8	14.9	43.3	34.8	4.3	12	11	13	0.65	0.03	91	5.4	57	106	59
19	female	49	151	59	25.8761	0	1	0	0	0	0	0	0	0	0	0	0	0	0	0	0	0	0	0	1	0	0	1	0	0	0	0	1	1	9	13.6	39.9	38.6	4.4	13	11	13	0.61	0.05	165	5.8	64	125	92
20	female	43	155	56	23.3091	0	0	0	0	0	0	0	0	0	0	0	0	0	0	0	0	0	1	0	0	0	0	1	0	1	1	0	0	1	8	13.4	40.9	27	4.6	15	13	15	0.56	0.02	82	5.6	49	129	123
21	female	44	152	51	22.0741	0	1	0	1	0	0	0	0	0	0	0	1	0	0	0	0	0	0	0	1	0	0	1	0	1	1	0	0	1	10	13.9	38.5	22.3	4.3	21	17	37	0.62	0.06	75	5.1	69	81	58
22	female	53	155	43	17.898	0	0	0	0	0	0	0	0	0	0	0	0	0	0	0	0	0	0	0	1	0	0	1	0	1	1	0	0	0	4.8	13.5	38.9	25	4.7	18	15	17	0.66	0.02	94	5.4	72	110	84
23	male	27	176	71	22.921	0	0	0	0	0	0	0	1	0	0	0	1	0	0	0	0	0	0	0	1	0	0	1	0	0	1	0	0	0	6.5	14.4	39.9	30	3.2	17	17	15	0.77	0.08	90	5.7	55	139	99
24	female	45	162	60	22.8624	0	0	0	0	0	0	0	0	0	0	0	0	0	0	0	0	0	0	0	0	0	0	1	0	1	1	0	0	1	5.6	15.8	45.3	28.2	4.5	18	13	18	0.55	0.05	91	5.3	57	134	30
25	female	30	156	57	23.4221	0	1	0	0	0	0	0	0	0	0	0	0	0	0	0	0	0	1	0	0	0	0	1	0	0	1	0	0	1	7.3	12.7	37.6	23.5	4.2	27	15	33	0.49	0.02	86	5.7	53	87	40
26	male	45	175	85	27.7551	0	0	0	0	0	0	0	0	0	0	0	0	0	0	0	0	0	0	1	1	0	0	1	0	0	0	0	1	1	5.1	14.7	42	24.7	4.7	19	18	12	0.81	0.05	92	5.5	48	101	110
27	female	48	161.5	64	24.5378	0	0	0	0	0	0	0	0	0	0	0	0	0	0	0	0	1	0	1	1	0	0	1	0	1	0	1	0	0	5.6	14.5	40.9	22.1	4.5	21	15	70	0.71	0.03	81	5	71	89	169
28	female	57	150	43	19.1111	0	0	0	0	0	0	0	0	0	0	1	0	0	0	0	0	0	0	0	1	0	1	0	0	1	0	1	0	0	4.2	10.1	32.5	35.4	4.2	19	11	16	0.49	0	108	6.5	83	81	36
29	female	24	154	52	21.9261	0	0	0	0	0	0	0	0	0	0	0	0	0	0	0	0	0	1	0	0	0	0	1	0	0	0	1	0	0	7.9	13.4	39.3	25.7	5	13	9	14	0.74	0.03	91	5.6	58	100	44
30	female	31	167	55	19.721	0	0	0	0	0	0	0	0	0	0	0	0	0	0	0	0	0	0	0	0	0	0	1	0	1	1	0	0	0	7	14.6	42.6	29.3	4.3	16	12	17	0.58	0.64	76	5.3	62	95	35
31	male	43	175	64	20.898	0	0	0	0	0	0	0	0	0	0	0	0	0	0	0	0	0	1	0	1	0	1	0	0	0	1	0	0	0	4.5	14.7	40.9	19.1	4.3	22	39	20	0.77	0.01	106	5.5	64	117	222
32	female	48	155	60	24.974	0	0	0	0	0	0	0	0	0	0	1	0	0	0	0	0	0	0	1	1	0	0	1	0	0	1	0	0	0	5.1	15.1	44.7	21.9	4.7	22	18	18	0.59	0.07	100	6.1	87	100	121
33	female	34	156	70	28.764	0	0	0	0	0	0	0	0	0	0	0	0	0	0	0	0	0	0	0	0	0	0	1	0	0	0	1	0	0	5.9	13.5	39.8	29.8	4.5	19	20	26	0.51	0.11	75	5.7	57	136	159
34	male	40	174	70	23.1206	0	0	0	0	0	1	0	0	0	0	0	0	0	0	0	0	0	1	0	1	0	0	1	0	0	1	0	0	1	6.5	15	41.8	28.7	4.4	28	25	142	0.78	0.01	71	5.2	50	76	188
35	female	45	156.5	49	20.0063	0	0	0	0	0	0	0	0	0	0	0	0	0	0	0	0	0	1	0	1	0	0	1	0	0	1	0	0	1	7	11.4	34	24.3	4.3	18	13	18	0.49	0.05	86	5.5	72	54	39
36	female	40	156	49	20.1348	0	0	0	0	0	0	0	0	0	0	0	0	0	0	0	0	0	1	0	0	0	0	1	0	0	1	0	0	1	7.1	14.8	42.4	33.5	4.6	15	9	22	0.56	0.03	83	5.3	77	142	58
37	female	33	158	48	19.2277	0	0	0	0	0	0	0	0	0	0	0	0	0	0	0	0	0	0	0	1	0	0	1	0	0	0	0	1	1	5	12	36.4	19.1	4.6	34	24	26	0.74	0.02	81	5.3	98	110	49
38	male	39	165	65	23.8751	0	0	0	0	0	0	0	0	0	0	0	0	0	0	0	0	0	0	0	0	0	0	1	0	1	0	0	1	0	8.1	15.6	45.1	23.3	4.6	33	26	17	0.86	0.66	82	5.8	53	105	50
39	female	22	154	52	21.9261	0	0	0	0	0	0	0	0	0	0	0	0	0	0	0	0	0	0	0	0	0	0	1	0	1	1	0	0	0	5.6	12.9	37.9	31.4	4.1	20	11	12	0.59	0.05	88	5.5	68	121	42
40	female	49	152	70	30.2978	0	0	0	1	1	0	0	0	0	0	0	1	1	0	0	0	0	1	0	1	0	0	1	0	1	1	0	0	1	9.4	14.5	42.5	28.1	4.3	16	17	19	0.42	0.12	89	7.4	49	80	110
41	female	55	157	53	21.5019	0	0	0	0	0	0	0	0	0	0	0	0	0	0	0	0	0	0	0	1	0	1	0	0	1	1	0	0	1	4.1	13.2	39	25.2	4.4	22	17	9	0.82	0.03	87	5.6	96	84	41
42	female	51	161	56	21.6041	0	0	0	0	0	0	0	0	0	0	0	0	0	0	0	0	0	0	0	0	0	0	1	0	0	1	0	0	1	4.3	13.8	40.2	24.9	4.2	18	10	14	0.59	0.04	84	5.4	74	97	75
43	female	43	160	47	18.3594	0	0	0	0	0	0	0	0	0	0	0	0	0	0	0	0	0	0	1	0	0	1	0	0	1	1	0	0	1	4.6	14.3	42.1	21.8	4.7	14	10	11	0.7	0	80	5.6	65	122	33
44	female	57	165	53	19.4674	0	0	0	0	0	0	0	0	0	0	0	0	0	0	0	0	0	0	0	1	0	1	0	0	1	1	0	0	1	6.4	13.8	39.5	23.4	4.6	26	19	41	0.62	0.03	99	5.8	65	113	223
45	male	72	170	78	26.9896	0	0	0	0	0	0	0	0	0	0	1	0	0	0	0	0	0	0	0	0	0	0	1	0	0	1	0	0	0	6.9	15.2	45.3	19.9	4.5	32	37	297	1.06	0.29	91	5.9	53	120	341
46	female	46	156	47	19.313	0	0	0	1	0	0	0	0	1	0	0	1	0	0	0	1	0	0	1	1	0	1	0	0	1	1	0	0	0	10.9	12.8	36.2	34.2	4.7	33	26	33	0.67	0.01	102	5.7	67	135	53
47	female	39	164	99	36.8084	0	0	0	0	0	0	0	0	0	0	0	0	0	0	0	0	0	0	0	0	0	0	1	0	1	0	0	1	1	9.1	15.1	42.9	24	4.9	54	79	27	0.59	0.03	118	7.7	54	168	104
48	female	46	155	52	21.6441	0	0	0	0	0	0	0	0	0	0	0	0	0	0	0	0	0	0	0	0	0	0	1	0	1	1	0	0	1	5.8	12.6	36.6	29.6	4.4	18	9	9	0.52	0.01	88	5.3	81	123	46
49	female	63	157	54	21.9076	0	0	0	0	0	0	0	0	0	0	0	0	0	0	0	0	0	0	0	0	0	1	0	0	0	1	0	0	1	6.6	13.2	39.4	24.1	4.4	18	14	16	0.56	0.01	100	6.1	79	108	71
50	female	36	160	53	20.7031	0	0	0	0	0	0	0	0	0	0	0	0	0	0	0	0	0	0	1	1	0	0	1	0	0	0	1	0	0	5.8	12.5	37.1	17.9	4.2	14	9	18	0.45	0.03	84	5.1	74	89	50
51	female	41	155	49	20.3954	0	0	0	0	0	0	0	0	0	0	0	0	0	0	0	0	0	0	0	0	0	0	1	0	1	1	0	0	1	5.8	13.5	39.7	28.4	4.5	19	12	13	0.61	0.01	83	5.9	89	92	43
52	female	33	160	50	19.5312	0	0	0	0	0	0	0	0	0	0	0	0	0	0	0	0	0	0	1	1	0	1	0	0	1	1	0	0	0	4.8	11.7	34.1	22.8	4.2	18	15	8	0.51	0.03	171	5.2	56	103	72
53	female	42	152	40	17.313	0	0	0	0	0	0	1	0	0	0	0	0	0	0	0	0	0	0	1	0	0	0	1	0	1	1	0	0	1	6.7	13.4	38.4	26.1	5	15	4	13	0.55	0.03	85	5.4	78	116	71
54	female	46	167	62	22.231	0	0	0	0	0	0	0	0	0	0	0	0	0	0	0	0	0	0	0	0	0	0	1	0	0	1	0	0	0	5.9	12.3	38.2	25.2	4.4	18	14	9	0.56	0.01	93	5.3	89	82	28
55	female	38	148	49	22.3703	0	0	0	0	0	0	0	0	0	0	0	0	0	0	0	0	0	0	0	1	0	0	1	0	0	1	0	0	1	6.2	14.3	42.1	27.8	4.7	19	10	8	0.61	0.05	66	5.5	55	115	115
56	male	36	167	70	25.0995	0	1	0	0	0	0	0	0	0	0	0	0	0	0	0	0	0	0	0	1	0	0	1	0	0	1	0	0	0	6.2	15.8	45	29.7	4.9	28	44	83	0.89	0.07	198	5.5	59	108	312
57	male	39	171	62	21.2031	0	1	0	0	0	0	0	0	0	0	0	0	0	0	0	0	0	1	0	1	0	0	1	0	0	1	0	0	1	6.8	16.8	47.2	34.3	4.6	23	30	56	0.67	0.06	101	5.1	59	128	85
58	male	43	172	89	30.0838	0	0	0	0	0	0	0	0	0	0	0	0	0	0	0	0	0	1	0	1	0	1	0	0	0	1	0	0	1	10	15.7	44.4	25	4.3	21	57	30	0.92	0.14	93	5.7	46	131	244
59	female	38	148	40	18.2615	0	0	0	0	0	0	0	0	0	0	0	0	0	0	0	0	0	1	0	0	0	0	1	0	0	1	0	0	1	9.6	14.2	42.1	31.2	4.5	14	10	15	0.65	0.01	88	5.7	55	142	50
60	female	49	163	84	31.6158	0	0	0	0	0	0	0	0	0	0	0	0	0	0	0	0	0	1	0	0	0	0	1	0	0	1	0	0	1	5.9	14.6	44.7	31	4.3	32	40	48	0.63	0.37	86	6	58	178	125
61	male	49	163	58	21.83	0	0	0	0	0	0	0	0	0	0	0	0	0	0	0	0	0	1	0	1	0	0	1	0	1	0	1	0	0	6.6	16.1	45.9	22.7	4.3	23	26	16	0.99	0.03	109	5.3	92	68	69
62	male	43	177	82	26.1738	0	0	0	0	0	0	0	0	0	0	0	0	0	1	1	0	0	0	1	1	0	0	1	0	0	1	0	0	1	6.2	15.9	44.8	24.5	4.4	34	61	42	0.85	0.04	92	5.7	47	74	116
63	female	36	153	43	18.369	0	0	0	0	0	0	0	0	0	0	0	0	0	0	0	0	0	0	0	1	0	0	1	0	0	1	0	0	0	4.5	13.1	37.6	28.1	4.5	21	16	17	0.54	0.02	89	5.8	57	124	89
64	male	39	164	54	20.0773	0	0	1	0	0	0	0	0	0	0	0	0	0	0	0	0	0	1	0	1	0	0	1	0	0	1	0	0	1	5.2	14.4	40	31.7	4.8	18	15	22	0.83	0.04	93	5.5	57	125	39
65	female	52	147	50	23.1385	0	0	0	0	0	0	0	0	0	0	0	0	0	0	0	0	0	1	0	0	0	1	0	0	1	1	0	0	1	5.5	12.5	36.4	21.4	4.8	27	19	12	0.48	0.04	77	5.3	82	100	59
66	female	38	162	61	23.2434	0	0	0	0	0	0	0	0	0	0	0	0	0	0	0	0	0	0	0	1	0	0	1	0	0	1	0	0	0	5.6	13.5	39.2	21.5	4.7	21	14	19	0.83	0.04	96	5.6	90	100	47
67	female	38	158	50	20.0288	0	0	0	0	0	0	0	0	0	0	0	0	0	0	0	0	0	0	0	1	0	0	1	0	0	1	0	0	1	7.6	13.6	38.2	25.2	4.6	21	24	36	0.58	0.01	103	5.4	51	107	62
68	female	55	170	71	24.5675	0	0	0	0	0	1	1	0	0	0	0	0	0	1	0	0	0	0	1	1	0	0	1	0	0	0	0	1	0	5.7	14.3	41.8	21.6	4.6	23	22	26	0.59	0.03	98	6	90	83	56
69	female	48	155	50	20.8117	0	1	0	0	0	0	0	0	0	0	0	0	0	0	0	0	0	0	0	0	0	0	1	0	0	1	0	0	1	6.8	13.7	40	32.9	4.3	18	16	16	0.67	0.15	73	5.4	68	128	102
70	female	57	150	51	22.6667	0	0	0	0	0	0	0	0	0	0	0	0	0	0	0	0	0	0	0	0	0	1	0	0	0	1	0	0	1	4.5	13.2	38.4	22.8	4.4	19	12	10	0.66	0.01	89	5.6	90	146	30
71	female	41	160	57	22.2656	0	0	0	0	0	0	0	0	0	0	0	0	0	0	0	0	0	0	0	1	0	0	1	0	0	0	1	0	1	6.4	10.6	32.7	39.9	4.9	16	8	13	0.53	0.01	88	5.6	74	109	51
72	male	43	176	96	30.9917	0	0	0	0	0	0	0	0	0	0	0	0	0	0	0	0	0	1	0	0	0	1	0	0	1	1	0	0	1	6	16.6	44.9	19.4	4.8	29	56	51	0.59	0.05	108	5.6	38	96	465
73	female	40	161.5	48	18.4033	0	0	0	0	0	0	0	0	0	0	0	0	0	0	0	0	0	0	1	1	0	0	1	0	1	1	0	0	1	7.6	14.1	41.1	23.3	5.1	16	12	58	0.49	0.02	105	5.6	80	77	46
74	female	35	158	52	20.83	0	0	0	0	0	0	0	0	0	0	0	0	0	0	0	0	0	0	0	1	0	0	1	0	0	1	0	0	0	5.8	10.5	32.6	26.9	5.1	19	11	17	0.6	0.01	93	5.8	60	114	51
75	female	46	150	42	18.6667	0	0	0	0	0	0	0	0	0	0	0	0	0	0	0	0	0	0	1	0	0	0	1	0	0	1	0	0	1	8.8	13.2	39.4	22	4.7	26	40	28	0.6	0.05	93	5.8	77	96	42
76	male	48	172	104	35.1541	0	0	0	1	1	0	0	0	0	0	0	0	1	0	0	0	0	0	0	1	0	1	0	0	0	1	0	0	1	8	16.1	45.1	18.2	4.4	33	45	18	0.92	0.18	87	8.9	54	84	68
77	male	37	166	62	22.4996	0	0	0	0	0	0	0	0	0	0	0	0	0	0	0	0	0	0	1	1	0	0	1	0	0	1	0	0	1	8	15	42.7	25.9	5.1	21	12	33	0.8	0.12	95	5.7	50	134	126
78	female	37	168	52	18.424	0	0	0	0	0	0	0	0	0	0	0	0	0	0	0	0	0	0	0	0	0	0	1	0	0	1	0	0	1	7.9	12.6	37.9	27.9	4.7	18	13	12	0.67	0.02	80	5.6	96	136	44
79	male	52	172	80	27.0416	0	0	0	0	0	1	0	0	0	0	0	0	0	1	0	0	0	1	0	1	0	0	1	0	0	1	0	0	1	4.9	13.9	41.5	23.9	4.5	18	17	42	1.02	0.02	134	6	52	128	280
80	female	56	159	55	21.7555	0	0	0	0	0	0	0	0	0	0	0	0	0	0	0	0	0	0	0	1	0	0	1	0	0	1	0	0	1	4	13.9	39.3	22.3	4.3	20	20	18	0.68	0.02	121	6	79	100	89
81	female	44	149	64	28.8275	0	1	0	1	0	0	0	0	1	0	0	1	0	0	0	0	0	0	0	0	0	0	1	0	1	1	0	0	1	9.8	14.8	42.8	40.6	4	12	8	14	0.49	2.13	85	5.8	80	92	117
82	female	43	157.5	55.6	22.4137	0	0	0	0	0	0	0	0	0	0	0	0	0	0	0	0	0	1	0	1	0	0	1	0	0	1	0	0	0	10.4	15.1	43.8	31.6	4.4	15	16	16	0.5	0.11	75	5.6	56	128	110
83	female	38	157	70	28.3987	0	0	0	0	0	0	0	0	0	0	0	0	0	0	0	0	0	0	0	1	0	0	1	0	0	1	0	0	1	7.2	13.9	40.9	32.5	4	29	44	87	0.54	0.79	75	5.3	59	96	122
84	male	41	169	77	26.9598	0	0	0	0	0	0	0	0	0	0	0	0	0	0	0	0	0	0	0	1	0	0	1	0	0	0	0	1	0	6.3	15	41.5	22.2	4.1	18	23	21	0.93	0.06	116	5.4	35	93	262
85	male	45	176	65	20.984	0	0	0	0	0	0	0	0	0	0	0	0	0	0	0	0	0	0	0	1	0	0	1	0	0	0	1	0	0	5.1	16.1	43.6	16	4.7	26	24	13	0.82	0.02	83	5.2	69	123	126
86	female	53	160	55	21.4844	0	0	0	0	0	0	0	0	0	0	0	0	0	0	0	0	0	0	0	1	0	0	1	0	1	1	0	0	1	4.9	13.8	40.1	22.2	4.8	23	22	40	0.6	0.02	84	5.6	62	114	70
87	female	57	154	48	20.2395	0	0	0	0	0	0	0	0	0	0	0	0	0	0	0	0	0	0	0	1	0	0	1	0	1	1	0	0	1	4.7	14	40	28.5	5.1	34	39	228	0.56	0.06	108	6.9	55	171	181
88	female	37	158	50	20.0288	0	0	0	0	0	0	0	0	0	0	0	0	0	0	0	0	0	0	0	1	0	0	1	0	0	1	0	0	1	6.6	12.3	37.8	31.9	4.4	18	14	14	0.5	0.36	94	5.7	72	105	53
89	male	77	172	73	24.6755	0	0	0	0	0	0	0	0	0	0	0	0	0	1	0	0	1	0	1	1	0	1	0	0	0	0	1	0	0	6.2	15.3	45.2	19.2	4.3	26	23	23	0.78	0.02	90	5.3	62	130	101
90	female	37	154	48	20.2395	0	0	0	0	0	0	0	0	0	0	0	0	0	0	0	0	0	0	0	0	0	0	1	0	0	1	0	0	1	5.1	13.8	38.8	25.4	4.3	21	16	11	0.61	0.01	157	5.4	82	129	69
91	female	42	150	40	17.7778	0	0	0	0	0	0	0	0	0	0	0	0	0	0	0	0	0	0	1	1	0	0	1	0	0	1	0	0	1	7.2	15.2	44.5	31.4	4.7	15	15	14	0.6	0.01	95	5.4	79	151	91
92	female	55	158	80	32.0461	0	1	0	1	0	1	0	0	0	0	0	1	0	0	0	0	1	1	0	0	0	0	1	0	0	1	0	0	1	10.1	14.1	40.6	25	4.4	26	45	68	0.77	0.23	98	6.2	50	122	269
93	female	58	157	57	23.1247	0	0	0	0	0	0	0	0	0	0	0	0	0	0	0	0	0	0	0	0	0	1	0	0	1	1	0	0	1	5	13.5	37.9	26.3	4.2	17	10	20	0.59	0.01	95	5.9	83	131	249
94	male	33	176	70	22.5981	0	0	0	1	0	0	0	0	0	0	0	0	0	0	0	0	0	0	0	1	0	0	1	0	0	1	0	0	0	6.4	14.2	41	24.7	4.6	21	20	34	0.71	0.08	133	5.5	63	108	68
95	female	30	160	42	16.4062	0	0	0	0	0	0	0	0	0	0	0	0	0	0	0	0	0	0	0	0	0	0	1	0	1	1	0	0	1	4.6	13.2	37.7	19.1	4.7	18	12	20	0.57	0.01	97	5.5	72	131	77
96	female	31	168	66	23.3844	0	0	0	0	0	0	0	0	0	0	0	0	0	0	0	0	0	1	0	0	0	1	0	0	1	0	1	0	1	6.9	14.5	41	23.7	4.3	17	11	12	0.74	0.01	99	5.1	57	117	121
97	female	38	156	55	22.6003	0	0	0	0	0	0	0	0	0	0	0	0	0	0	0	0	0	0	1	1	0	0	1	0	1	1	0	0	0	7	13.4	39.2	24.5	4.3	24	25	28	0.62	0.03	78	5.8	65	108	41
98	male	37	172	78	26.3656	0	0	0	0	0	0	0	0	0	0	0	0	0	0	0	0	0	0	1	1	0	0	1	0	0	0	1	0	0	6.9	13.7	39.8	24.5	4.5	16	19	18	0.8	0.81	88	5.7	47	71	131
99	male	42	173	62	20.7157	0	0	0	0	0	0	0	0	0	0	0	0	0	0	0	0	0	0	1	0	0	0	1	0	0	0	1	0	1	5.6	16.7	45.3	19.8	4.7	20	24	21	0.76	0.05	90	5.4	56	133	105
100	male	48	167	61	21.8724	0	0	0	0	0	0	0	0	0	0	0	0	0	0	0	0	0	0	1	1	0	0	1	0	0	1	0	0	1	6.5	15.4	44.3	25.8	4.4	21	23	22	0.9	0.02	136	5.8	76	115	233
101	female	43	159	67	26.5021	0	0	0	1	0	0	0	0	0	0	0	1	0	0	0	0	0	0	1	1	0	0	1	0	1	1	0	0	1	7.4	14	38.4	29.1	4.6	16	15	37	0.66	0.11	92	5.2	56	123	90
102	female	47	163	63	23.7118	0	0	0	0	0	0	0	0	0	0	1	0	0	0	0	0	0	0	0	1	0	0	1	0	0	0	1	0	0	6	13	37.3	22.1	4.5	24	20	16	0.63	0.04	87	5.6	46	121	127
103	male	50	170	74	25.6055	0	0	0	1	0	1	0	0	0	0	0	1	0	1	0	0	0	1	0	1	0	0	1	0	1	1	0	0	1	5.4	16.1	45.8	23.3	4.7	23	36	128	0.76	0.08	106	6.2	55	107	74
104	female	35	165	60	22.0386	0	0	0	1	0	0	0	0	0	0	0	1	0	0	0	0	0	1	0	1	0	0	1	0	1	1	0	0	1	8	13.8	38.9	29.8	4.6	16	12	37	0.56	0.02	86	5.1	62	74	90
105	female	26	152	48	20.7756	0	0	0	0	0	0	0	0	0	0	0	0	0	0	0	0	0	0	0	0	0	0	1	0	0	0	1	0	1	5	13.3	38.9	28.2	4.6	25	14	10	0.54	0.01	85	5.5	69	83	21
106	female	42	153	58	24.7768	0	0	0	0	0	0	0	0	0	0	0	0	0	0	0	0	0	0	0	0	0	0	1	0	0	1	0	0	1	8	11.9	35.2	26.8	4.4	17	11	12	0.68	0.12	79	5.5	61	117	231
107	male	45	171	72	24.623	0	0	0	0	0	0	0	0	0	0	0	0	0	0	0	0	0	1	0	1	0	0	1	0	0	1	0	0	1	5.8	16.3	44.7	19.7	4.8	22	34	47	0.72	0.01	125	5.9	47	99	114
108	male	32	178	77	24.3025	0	0	0	0	0	0	0	0	0	0	0	0	0	0	0	0	0	0	0	0	0	0	1	0	1	1	0	0	1	8.7	15.9	45.2	28.3	5.1	23	42	20	0.83	0.08	92	5.8	47	144	299
109	female	34	159	52	20.5688	0	0	0	0	0	0	0	0	0	0	0	0	0	0	0	0	0	0	0	1	0	0	1	0	1	1	0	0	0	6.7	11.6	35.3	24.7	4.5	20	12	8	0.57	0.01	104	5.2	78	99	59
110	female	48	161	55	21.2183	0	0	0	0	0	0	1	0	0	0	0	0	0	0	0	0	0	0	1	1	0	1	0	0	1	1	0	0	0	4.9	14.2	41	21.5	4.2	17	15	16	0.55	0.01	98	5.5	62	106	65
111	female	39	148	45	20.5442	0	0	0	0	0	0	0	0	0	0	0	0	0	0	0	0	0	0	1	1	0	0	1	0	1	0	1	0	0	7	14	38.7	20.4	4.4	23	13	29	0.54	0.02	106	5.7	71	82	99
112	female	36	160	70	27.3438	0	0	0	0	0	0	0	0	0	0	0	0	0	0	0	0	0	0	1	1	0	0	1	0	0	1	0	0	0	9.5	13.9	40.9	30.8	4.7	16	17	26	0.63	0.24	84	5.6	53	100	116
113	male	35	174	57	18.8268	0	0	0	0	0	0	0	0	0	0	0	0	0	0	0	0	0	1	0	1	0	0	1	0	0	0	1	0	0	7.2	15.2	42.7	24.7	4.9	20	18	12	0.83	0.01	92	5.2	63	85	76
114	male	72	173	68	22.7204	0	0	0	0	0	0	0	0	0	0	1	0	0	0	0	0	0	0	1	1	0	0	1	0	0	1	0	0	0	7.4	14.5	41.3	20.2	4	18	24	24	0.99	0.03	95	5.8	47	137	158
115	female	38	167	52	18.6453	0	0	0	0	0	0	0	0	0	0	0	0	0	0	0	0	0	0	1	0	0	0	1	0	1	1	0	0	1	6.5	14.1	41.4	32.3	4.8	24	29	12	0.56	0.01	78	5.7	63	108	68
116	female	36	154.6	49.6	20.7521	0	0	0	0	0	0	0	0	0	0	0	0	0	0	0	0	0	0	0	1	0	0	1	0	0	1	0	0	1	5.3	13.5	39.4	25.5	4.6	12	8	7	0.61	0.01	99	5.4	60	104	141
117	male	64	164	66	24.539	0	0	0	0	1	0	0	0	0	0	0	1	1	0	1	0	0	0	0	1	0	1	0	0	0	1	0	0	1	4.6	15.1	43.2	28.6	4.4	20	15	14	0.66	0.03	123	6.6	65	119	59
118	male	41	178	68	21.4619	0	0	0	0	0	0	0	0	0	0	0	0	0	0	0	0	0	1	0	1	0	1	0	0	1	0	1	0	0	5.7	14.9	40.1	18.7	4.6	21	21	22	0.83	0.06	86	5.7	62	132	102
119	female	58	162	46	17.5278	0	0	0	0	0	0	0	0	0	0	0	0	0	0	0	0	0	1	0	1	0	0	0	1	0	1	0	0	1	6.8	12.6	36.7	25.9	4.2	20	11	15	0.62	0.02	129	5.9	61	107	240
120	female	37	160	54	21.0938	0	0	0	0	0	0	0	0	0	0	0	0	0	0	0	0	0	0	0	0	0	0	1	0	1	0	1	0	1	7.1	12.7	37.2	18.6	4.4	16	18	17	0.66	0.03	87	5.6	63	88	120
121	female	34	170	62	21.4533	0	0	0	0	0	0	0	0	0	0	0	0	0	0	0	0	0	0	1	1	0	0	1	0	1	1	0	0	1	6.3	13.4	39.4	16.4	5.2	16	9	8	0.53	0.01	90	5.7	63	77	41
122	male	33	171	54	18.4672	0	1	0	0	0	0	0	0	0	0	0	0	0	0	0	0	0	0	0	0	0	0	1	0	0	0	0	1	0	5.3	15.5	43.3	20.4	4.8	18	13	14	0.73	0.01	93	5.4	43	96	77
123	male	49	178	65	20.5151	0	0	0	0	0	0	0	0	0	0	0	0	0	0	0	0	0	0	1	1	0	0	1	0	0	0	1	0	0	5.4	15.2	45.1	20.7	4.5	30	27	29	0.73	0.02	83	5.6	87	92	40
124	female	41	156	50	20.5457	0	0	0	0	0	0	0	0	0	0	0	0	0	0	0	0	0	0	0	1	0	0	1	0	0	0	1	0	0	5.8	10.7	31.8	30.8	3.3	15	9	18	0.5	0.01	86	5.3	87	33	136
125	male	48	175	75	24.4898	0	0	0	0	0	0	0	0	0	0	0	0	0	0	0	0	0	0	0	0	0	0	1	0	0	1	0	0	0	5.3	15.9	44	22.5	4.2	26	35	94	0.95	0.04	80	5.4	36	105	144
126	female	31	155	70	29.1363	0	1	0	0	0	1	0	0	0	0	0	0	0	0	0	0	0	0	0	1	0	0	1	0	1	1	0	0	1	9	13.7	39.5	31.2	4.3	36	49	15	0.6	0.02	140	5.8	64	275	146
127	male	63	173	78	26.0617	1	0	0	0	0	1	0	0	0	0	1	0	0	0	0	0	0	1	0	0	0	0	1	0	0	0	1	0	1	8.5	14.9	43.3	28.1	4.3	17	22	41	1.58	0.12	90	5.7	44	152	203
128	female	37	154	43	18.1312	0	1	0	0	0	1	0	0	0	0	0	0	0	0	0	0	0	0	0	1	0	0	1	0	0	1	0	0	0	5.6	13.2	39.3	20.2	4.5	19	10	20	0.58	0.02	61	5.4	59	83	95
129	female	42	148	41	18.718	0	0	0	0	0	0	0	0	0	0	0	0	0	0	0	0	0	0	0	0	0	0	1	0	1	1	0	0	0	6.4	10.3	32	44	4.8	18	13	13	0.55	0.01	91	5.6	91	79	46
130	female	46	158.5	49	19.5046	0	0	0	0	0	0	0	0	0	0	0	0	0	0	0	0	0	0	0	1	0	0	1	0	0	1	0	0	0	5.7	11.4	35.1	43.6	4.6	20	10	13	0.58	0.01	82	5.9	83	159	76
131	male	36	172	62	20.9573	0	0	0	0	0	0	0	0	0	0	0	0	0	0	0	0	0	0	0	1	0	1	0	0	1	0	1	0	0	5.5	15.7	43.6	17.6	4.8	17	11	13	0.76	0.03	97	5.5	42	122	106
132	female	46	163	51	19.1953	0	0	0	0	0	0	0	0	0	0	0	0	0	0	0	0	0	0	0	0	0	0	1	0	1	1	0	0	1	6.7	13.2	36.7	31.4	4.2	15	8	11	0.53	0.04	91	5.5	59	144	118
133	female	53	154	56	23.6128	0	0	0	1	0	1	0	0	0	0	0	1	0	1	0	0	0	0	0	1	0	1	0	0	0	1	0	0	1	8.7	14.2	40	37.8	4.8	18	14	21	0.59	0.13	100	5.8	62	146	77
134	male	46	171	60	20.5191	0	0	0	0	0	0	0	0	0	0	0	0	0	0	0	0	0	0	1	0	0	0	1	0	1	1	0	0	1	4.8	15.2	43.3	24.2	4.7	18	16	33	0.85	0.05	95	5.9	66	160	68
135	female	29	155	55	22.8928	0	1	0	0	0	0	0	0	0	0	0	0	0	0	0	0	0	0	0	0	0	0	1	0	0	1	0	0	1	11.8	13.2	38.2	28	4.1	21	14	9	0.51	1.03	127	5.3	81	119	72
136	male	36	174	68	22.46	0	0	0	0	0	0	0	0	0	0	0	0	0	0	0	0	0	0	1	0	0	0	1	0	0	1	0	0	1	5.2	16.9	46.8	28.7	4.9	22	26	39	0.74	0.01	80	5.3	74	168	74
137	male	38	172	88	29.7458	0	1	0	0	0	0	0	0	0	0	0	0	0	0	0	0	0	1	0	1	0	1	0	0	1	1	0	0	0	4.7	16.5	46.2	16.1	4.7	25	57	44	1.1	0.07	96	5.7	35	137	187
138	female	39	164	50	18.5901	0	0	0	0	0	0	0	0	0	0	0	0	0	0	0	0	0	0	0	0	0	0	1	0	1	1	0	0	0	6.7	13.8	38.6	21.4	4.2	14	8	16	0.67	0.01	134	5.5	74	61	78
139	female	28	157	48	19.4734	0	0	0	0	0	0	0	0	0	0	0	0	0	0	0	0	0	0	0	0	0	0	1	0	1	1	0	0	1	7.9	13.2	36.9	30.2	4.5	11	8	12	0.55	0.02	113	5.2	59	96	84
140	male	54	163.5	64	23.9411	0	0	0	0	0	0	0	0	0	0	0	0	0	0	0	0	0	0	1	1	0	0	1	0	1	1	0	0	1	7.5	15.7	44	21.6	4.4	25	30	72	0.81	0.11	101	5.3	44	127	173
141	female	44	158	48	19.2277	0	0	0	0	0	0	0	0	0	0	0	0	0	0	0	0	0	0	1	1	0	0	1	0	0	1	0	0	1	5.1	14.3	40.9	25.4	4.7	20	26	29	0.51	0.02	79	5.2	62	94	41
142	female	34	151	38	16.6659	0	0	0	0	0	0	0	0	0	0	0	0	0	0	0	0	0	1	0	0	0	0	1	0	1	1	0	0	1	4.7	14.2	42.3	29.3	4.8	19	15	18	0.52	0.01	83	5.8	68	118	44
143	female	52	153	52	22.2137	0	0	0	1	0	0	0	0	0	0	0	1	0	0	0	0	0	0	0	0	0	0	1	0	0	1	0	0	0	5.2	13.7	40.3	19.7	4.7	18	11	11	0.6	0.02	88	5.5	93	121	74
144	male	38	173	62	20.7157	0	0	1	0	0	0	0	0	0	0	0	0	0	0	0	0	0	0	1	1	0	0	1	0	0	0	1	0	1	4.6	13.8	40	17.3	4.5	21	18	16	0.71	0.01	94	5.3	85	98	71
145	female	26	155	48	19.9792	0	0	0	0	0	0	0	0	0	0	0	0	0	0	0	0	0	0	0	0	1	0	0	0	1	1	0	0	1	4.7	12.9	38.1	23.1	4.7	17	19	15	0.45	0.01	91	5.8	49	88	134
146	male	34	163	65	24.4646	0	0	0	0	0	0	0	0	0	0	0	0	0	0	0	0	0	0	0	0	0	1	0	0	1	1	0	0	1	6.4	15.6	45.4	26.2	4.9	14	11	17	0.68	0.1	99	5.8	62	90	36
147	female	33	153	45	19.2234	0	0	0	0	0	0	0	1	0	0	0	0	0	0	0	0	0	0	0	1	0	0	1	0	0	1	0	0	1	5.3	12.6	35.6	26.7	4.8	20	16	14	0.55	0.02	98	5.5	77	124	89
148	female	34	162	68	25.9107	0	0	0	0	0	0	0	0	0	0	0	0	0	0	0	0	0	0	1	1	0	1	0	0	1	0	1	0	1	7	13.8	42.4	26.2	4.3	14	10	12	0.87	0.79	97	5.4	53	141	76
149	female	44	162	61	23.2434	0	0	0	0	0	0	0	0	0	0	0	0	0	0	0	0	0	0	0	0	0	0	1	0	0	0	1	0	0	7.2	12.8	38.2	24.8	4.3	16	12	14	0.56	0.03	88	5.2	75	132	106
150	male	26	175	75	24.4898	0	0	0	0	0	0	0	0	0	0	0	0	0	0	0	0	0	1	0	0	0	1	0	0	1	1	0	0	0	7.5	15.1	42	19.3	4.6	25	47	42	0.92	0.01	95	5.8	50	108	129
151	male	32	178	72	22.7244	0	0	0	0	0	0	0	0	0	0	0	0	0	0	0	0	0	0	0	1	0	0	1	0	0	1	0	0	0	6.2	14.6	42.3	24.5	5	25	28	21	0.72	0.03	81	5.4	60	150	79
152	male	35	178	95	29.9836	0	0	0	0	0	0	0	0	0	0	0	0	0	0	0	0	0	0	1	1	0	0	1	0	0	1	0	0	1	9	16.2	45.5	26.2	5.2	21	60	66	0.88	0.21	123	9.6	39	119	170
153	female	31	161	64	24.6904	0	0	0	0	0	0	0	0	0	0	0	0	0	0	0	0	0	0	0	1	0	1	0	0	1	0	1	0	0	6.2	14.4	41.2	34.5	4.2	71	25	12	0.65	0.03	88	5.6	66	112	47
154	female	56	161	57	21.9899	0	0	0	0	0	0	0	0	0	0	0	0	0	0	0	0	0	0	1	0	0	0	1	0	1	1	0	0	0	4.4	14.8	42.7	23.8	4.6	23	10	9	0.59	0.02	93	5.7	80	159	54
155	female	36	160	58	22.6562	0	0	0	0	0	0	0	0	0	0	0	0	0	0	0	0	0	0	0	1	0	0	1	0	1	1	0	0	1	6.1	12	35.3	38.1	4.4	21	12	10	0.67	0.04	88	5.5	70	99	81
156	female	35	159.4	58	22.8271	0	0	0	0	0	0	0	0	0	0	0	0	0	0	0	0	0	0	0	0	0	0	1	0	0	0	0	1	0	7.4	14.1	40.4	27.8	4.5	15	10	24	0.59	0.02	87	5.8	55	90	44
157	female	40	156	95	39.0368	0	1	0	0	0	0	0	0	0	0	0	0	0	0	0	0	0	0	0	0	0	0	1	0	1	0	1	0	0	8	14.6	40.3	25.2	4.2	45	58	29	0.41	0.62	104	7	45	96	60
158	male	29	174	60	19.8177	0	0	0	0	0	0	0	0	0	0	0	0	0	0	0	0	0	1	0	1	0	1	0	0	0	0	1	0	0	5.4	13.9	40.4	21.6	5.1	27	45	39	0.66	0.01	97	5.4	57	94	90
159	male	47	175	72	23.5102	0	0	0	0	0	0	0	0	0	0	0	0	0	0	0	0	0	0	0	0	0	0	1	0	0	1	0	0	1	3.8	15	42.9	25.5	4.9	24	27	16	0.88	0.03	98	5.7	53	148	43
160	female	39	148	48	21.9138	0	0	0	0	0	0	0	0	0	0	0	0	0	0	0	0	0	0	0	0	0	0	1	0	1	1	0	0	1	4.6	11.2	33.4	30.9	4.1	20	17	17	0.52	0.08	106	5.7	77	117	51
161	male	36	175	70	22.8571	0	0	0	0	0	0	0	0	0	0	0	0	0	0	0	0	0	1	0	1	0	0	1	0	0	1	0	0	1	6.2	14.4	40.8	38.5	4.7	25	35	27	0.87	0.24	96	6.1	57	75	54
162	female	46	153	50	21.3593	0	0	0	0	0	0	0	0	0	0	0	0	0	0	0	0	0	0	0	0	0	0	1	0	0	1	0	0	1	5.6	12.9	37.4	32.1	4.2	17	11	15	0.48	0.05	84	5.8	61	119	39
163	female	48	159.5	67	26.3362	0	0	0	1	1	0	0	0	0	0	0	1	0	0	0	0	0	1	0	0	0	0	1	0	0	1	0	0	1	9.8	14.5	42.5	39.1	3.8	12	17	27	0.66	0.57	159	10.1	69	160	92
164	female	38	154	51	21.5045	0	1	0	0	0	0	0	0	0	0	0	0	0	0	0	0	0	0	0	0	0	0	1	0	0	0	1	0	0	5.7	13	37.6	27	4.9	16	23	9	0.65	0.02	95	5.5	101	118	58
165	male	34	177	63	20.1092	0	0	0	0	0	0	0	0	0	0	0	0	0	0	0	0	0	0	0	0	0	0	1	0	0	1	0	0	0	4.7	15.2	42.6	19.4	4.6	28	24	39	0.88	0.01	126	5.6	70	132	102
166	female	50	166	50	18.1449	0	0	0	0	0	0	0	0	0	0	0	0	0	0	0	0	0	1	0	1	0	0	1	0	0	1	0	0	0	7.8	13.6	40.6	26.9	4.9	24	12	17	0.74	0.03	101	6	100	132	109
167	female	50	154	53	22.3478	0	0	0	0	0	0	0	0	0	0	0	0	0	0	0	0	0	1	0	0	0	1	0	0	0	1	0	0	1	6.5	13.5	38.8	24.4	4.6	16	15	18	0.75	0.02	92	5.5	56	151	56
168	male	27	178	69	21.7776	0	0	0	0	0	0	0	0	0	0	0	0	0	0	0	0	0	0	0	1	0	0	1	0	0	0	0	1	0	8.2	15.4	42.4	21.2	4.9	16	18	8	1.03	0.06	120	5.2	62	71	65
169	female	46	155	51.5	21.436	0	0	0	0	0	0	0	0	0	0	0	0	0	0	0	0	0	0	0	1	0	0	1	0	1	1	0	0	1	7.8	14.2	41.4	33.1	5	16	9	14	0.52	0.02	91	6	86	86	57
170	female	56	155	56	23.3091	0	0	0	1	0	0	0	0	0	0	0	1	0	0	0	0	0	0	0	1	0	0	1	0	0	1	0	0	1	5.2	13.8	40.2	41.4	4.6	17	19	25	0.59	0.05	93	5.9	53	129	79
171	male	42	168	68	24.093	0	0	0	0	0	1	0	0	0	0	0	0	0	1	0	0	0	0	0	0	0	0	1	0	0	0	1	0	0	5	14.8	42.9	17.8	4.6	17	21	14	0.79	0.02	82	5.6	59	96	73
172	female	43	153	50	21.3593	0	0	0	0	0	0	0	0	0	0	0	0	0	0	0	0	0	0	0	1	0	1	0	0	1	1	0	0	0	9.1	15.4	45.2	26.9	5.1	18	10	21	0.7	0.02	85	5.4	90	87	43
173	male	27	179	64	19.9744	0	0	0	0	0	0	0	0	0	0	0	0	0	0	0	0	0	1	0	1	0	0	1	0	0	0	1	0	0	5.9	15.6	43.1	25.1	4.8	17	16	21	0.9	0.01	84	5.7	50	84	111
174	female	44	152	48	20.7756	0	0	0	1	0	0	0	0	0	0	0	1	0	0	0	0	0	0	0	0	0	0	1	0	0	1	0	0	1	6.1	13.2	36.2	23.5	4.6	15	12	11	0.51	0.03	87	5.5	39	101	249
175	female	47	153	69	29.4758	0	0	0	0	0	0	0	0	0	0	0	0	0	0	0	0	0	0	0	0	0	0	1	0	0	0	1	0	0	5.4	13.2	38.4	24.5	4.3	19	16	26	0.46	0.07	90	5.6	71	126	90
176	male	36	170	71	24.5675	0	0	0	0	0	0	0	0	0	0	0	0	0	0	0	0	0	0	0	1	0	1	0	0	0	0	1	0	0	6.8	16.4	45.8	19.8	5	19	24	72	0.7	0.05	90	5.3	48	103	233
177	male	61	175	70	22.8571	0	0	0	0	0	0	0	0	0	0	0	0	0	0	0	0	0	0	0	0	0	0	1	0	0	0	1	0	0	6.5	14.2	41.6	18.5	4.1	27	25	34	0.81	0.01	83	5.9	74	130	31
178	female	30	166	55	19.9594	0	1	0	0	0	0	0	0	0	0	0	0	0	0	0	0	0	0	0	0	0	0	1	0	1	1	0	0	1	7.1	15.3	45.5	23.5	4.7	20	13	13	0.64	0.02	88	5.4	51	116	66
179	female	47	163	48	18.0662	0	0	0	0	0	0	0	0	0	0	0	0	0	0	0	0	0	0	0	0	0	0	1	0	1	0	1	0	0	6.9	11.5	34.3	22.8	4.1	17	17	22	0.71	0.01	90	5.9	62	86	127
180	male	38	178	70	22.0932	0	0	0	0	0	0	0	0	0	0	0	0	0	0	0	0	0	0	0	1	0	0	1	0	1	0	0	1	0	4.8	15	41.9	24	5.1	42	39	59	0.58	0.03	96	5.1	102	103	70
181	male	29	160	59	23.0469	0	0	0	0	0	0	0	0	0	0	0	0	0	0	0	0	0	1	0	0	0	0	1	0	0	1	0	0	1	6.6	13.7	40.1	27.2	4.7	19	25	56	0.66	0.42	101	5.9	39	73	48
182	female	43	162	55	20.9572	0	0	0	0	0	0	0	0	0	0	0	0	0	0	0	0	0	0	0	1	0	0	1	0	1	1	0	0	0	4.6	14.3	42.9	31.9	5.1	20	16	18	0.71	0.05	78	5.4	102	232	56
183	male	28	167	60	21.5139	0	0	0	1	0	0	0	0	0	0	0	0	0	0	0	0	0	0	0	1	0	0	1	0	0	1	0	0	0	5.8	15.4	40.9	19.4	4.9	17	13	19	0.87	0.03	87	5.1	46	112	213
184	female	29	165	61	22.4059	0	0	0	0	0	0	0	0	0	0	0	0	0	0	0	0	0	0	0	0	0	0	1	0	1	1	0	0	1	5.3	13.5	37.7	27	4.8	17	13	13	0.44	0.04	94	5.2	49	119	98
185	female	35	167	53	19.0039	0	0	0	0	0	0	0	0	0	0	0	0	0	0	0	0	0	0	0	1	0	0	1	0	0	0	1	0	0	4.6	14.1	38.7	18.5	4.4	17	12	23	0.6	0.02	110	5.7	81	104	86
186	male	38	176	72	23.2438	0	1	0	0	0	0	0	0	0	0	0	0	0	0	0	0	0	0	0	1	0	0	1	0	1	1	0	0	0	5.1	14.5	40.7	21	4.9	17	13	18	0.85	0.01	88	5.4	57	131	74
187	male	35	178	88	27.7743	0	0	0	0	0	0	0	0	0	0	0	0	0	0	0	0	0	0	0	0	0	0	1	0	0	0	1	0	0	6.8	15.8	45.5	30.4	5	30	50	26	0.73	0.09	75	5.8	45	120	77
188	female	28	163	65	24.4646	0	0	0	0	0	0	0	0	0	0	0	0	0	0	0	0	0	0	0	0	0	0	1	0	0	1	0	0	1	8.2	14.4	43.1	35.5	4.6	49	94	19	0.55	0.19	84	5.5	45	118	67
189	female	29	167	54	19.3625	0	0	0	0	0	0	0	0	0	0	0	0	0	0	0	0	0	0	0	1	0	0	1	0	0	1	0	0	1	5.6	13.8	39.5	23.1	4.8	23	12	19	0.58	0.03	89	5.4	70	75	32
190	female	46	165	70	25.7117	0	0	0	0	0	0	0	0	0	0	0	0	0	0	0	0	0	0	1	1	0	0	1	0	1	1	0	0	0	6.6	14	40.5	32	4.8	17	13	19	0.58	0.05	96	5.7	87	147	80
191	female	35	155.5	46.5	19.2306	0	0	0	1	0	0	0	0	0	0	0	1	0	0	0	0	0	1	0	1	0	0	1	0	0	1	0	0	0	6.3	14.3	41.3	36	5	16	10	13	0.44	0.01	78	5	75	98	46
192	male	28	164	65	24.1672	0	0	0	0	0	0	0	0	0	0	0	0	0	0	0	0	0	0	0	1	0	0	1	0	1	0	1	0	0	6	13.9	39.3	24	4.8	23	15	14	0.8	0.01	73	5.7	57	88	110
193	male	30	175	60	19.5918	0	0	0	0	0	0	0	0	0	0	0	0	0	0	0	0	0	1	0	1	0	0	1	0	0	0	1	0	0	5.3	15.1	42.8	24.6	4.6	15	9	18	0.85	0.07	93	5.5	61	115	77
194	male	25	164	53	19.7055	0	0	0	0	0	0	0	0	0	0	0	0	0	0	0	1	0	1	0	0	0	1	0	0	1	0	0	1	0	4.6	15.2	42.1	21.8	4.3	19	17	15	0.88	0.03	83	5.6	49	70	54
195	female	41	155	46	19.1467	0	0	0	0	0	0	0	0	0	0	1	0	0	0	0	0	0	0	0	1	0	0	1	0	0	1	0	0	0	6.3	12.4	36.6	21	4.5	14	8	20	0.53	0	78	5.8	77	80	52
196	female	30	158	49	19.6283	0	0	0	0	0	0	0	0	0	0	0	0	0	0	0	0	0	0	0	1	0	0	1	0	1	1	0	0	0	6.5	13	35.9	25.3	4.4	16	10	17	0.64	0.15	98	5.3	63	145	163
197	male	55	175	85	27.7551	0	0	0	1	0	0	0	0	0	0	0	1	0	0	0	0	0	0	1	0	0	0	1	0	0	1	0	0	0	7.6	16.1	46.8	34.1	4.6	33	47	33	0.96	0.04	94	5.8	49	108	152
198	female	29	161	50	19.2894	0	0	0	0	0	0	0	0	0	0	0	0	0	0	0	0	0	0	0	1	0	0	1	0	0	1	0	0	1	6.9	13.9	40.3	31	4.8	20	17	10	0.5	0.2	70	5.3	58	86	71
199	male	28	171	85	29.0688	0	0	0	0	0	0	0	0	0	0	0	0	0	0	0	0	0	0	0	0	0	0	1	0	0	1	0	0	0	6.8	17.1	46.3	21.6	5.1	21	35	31	1.02	0.04	89	5.3	43	92	120
200	female	25	155	50	20.8117	0	0	0	0	0	0	0	0	0	0	0	0	0	0	0	0	0	1	0	1	0	0	0	1	0	1	0	0	1	6.2	12.5	37.2	32.4	4.3	11	9	11	0.44	0.06	85	5.9	51	80	40
201	female	40	161	50	19.2894	0	0	0	0	0	1	0	0	0	0	0	0	0	1	0	0	0	0	0	1	0	0	0	1	0	1	0	0	1	4.8	13.7	38.6	19.7	4.6	18	14	8	0.57	0.01	90	5.4	62	69	82
202	female	35	159	56	22.151	0	0	0	0	0	0	0	0	0	0	0	0	0	0	0	0	0	0	0	1	0	0	1	0	0	0	1	0	1	5.8	14.6	39	20.8	4.5	22	20	16	0.53	0.04	84	5.4	52	117	65
203	male	26	178	61	19.2526	0	0	0	0	0	0	0	0	0	0	0	0	0	0	0	0	0	1	0	1	0	1	0	0	1	1	0	0	1	6.4	15.5	42.4	23.7	5.1	16	15	12	0.81	0.02	95	5.4	81	86	87
204	male	55	168.7	67	23.5421	0	0	0	0	0	0	0	0	0	0	0	0	0	0	0	0	0	0	0	1	0	0	1	0	0	1	0	0	0	5.6	14.5	43.1	19.8	4.8	18	16	17	0.99	0.26	91	5.7	53	155	126
205	female	28	164	54	20.0773	0	0	0	0	0	0	0	0	0	0	0	0	0	0	0	0	0	0	0	1	0	0	1	0	1	1	0	0	1	5.4	14	38.4	28.2	4.6	17	14	28	0.63	0.05	85	5.3	66	130	100
206	female	38	160	64	25	0	0	0	0	0	0	0	0	0	0	0	0	0	0	0	0	0	1	0	1	0	0	1	0	0	1	0	0	1	7.7	14.9	41.4	26.9	4.3	19	19	30	0.49	0.06	91	5.3	73	94	183
207	female	27	168	60	21.2585	0	0	0	0	0	0	0	0	0	0	0	0	0	0	0	0	0	0	0	1	0	0	0	1	1	0	0	1	0	6.2	13.7	40.3	22.1	4.6	17	13	11	0.55	0.09	87	5.5	53	111	70
208	female	39	164	52	19.3337	0	0	0	0	0	0	0	0	0	0	0	0	0	0	0	0	0	0	0	1	0	0	1	0	1	1	0	0	0	8.5	11.8	34.6	20.3	4.3	11	3	10	0.52	0.02	84	5.2	65	100	97
209	male	30	168	72	25.5102	0	0	0	0	0	0	0	0	0	0	0	0	0	0	0	0	0	0	0	1	0	0	1	0	0	0	1	0	0	9.4	15.3	44.5	19.5	4.9	22	21	42	0.83	0.04	84	5.3	49	90	78
210	male	25	175	68	22.2041	0	0	0	0	0	0	0	0	1	0	0	0	0	0	0	0	0	0	0	0	0	0	1	0	0	0	1	0	0	8.4	16.3	46	23.7	4.7	26	35	12	0.77	0.02	88	5.5	51	103	59
211	female	25	161	52	20.061	0	0	0	0	0	0	0	0	0	0	0	0	0	0	0	0	0	0	0	0	0	0	1	0	0	0	0	1	0	6.8	13.1	36.2	29.8	4.5	15	7	9	0.6	0.01	84	5.1	55	64	87
212	female	28	169	57	19.9573	0	0	0	0	0	0	0	0	0	0	0	0	0	0	0	0	0	0	0	1	0	0	1	0	0	0	1	0	0	4.8	12.3	36.1	28.2	4.5	17	11	16	0.72	0.01	87	5.5	90	53	86
213	female	26	156	45	18.4911	0	0	0	0	0	0	0	0	0	0	0	0	0	0	0	0	0	0	0	0	0	0	1	0	0	1	0	0	0	7.1	12.9	38.6	20.8	4.3	18	12	14	0.67	0	188	5.7	66	86	96
214	female	26	154	47	19.8178	0	0	0	0	0	0	0	0	0	0	0	0	0	0	0	0	0	0	0	1	0	0	1	0	0	0	1	0	0	6.6	13	37.4	23.1	4.6	20	15	29	0.51	0.02	89	5.4	74	93	98
215	female	38	153	53	22.6409	0	0	0	1	0	0	0	0	0	0	0	1	0	0	0	0	0	0	1	1	0	0	1	0	0	0	1	0	0	4.5	13.9	40.9	38.6	4.7	18	15	42	0.53	0.05	96	5.2	70	131	115
216	female	25	151	57	24.9989	0	0	0	0	0	0	0	0	1	0	0	0	0	0	0	0	0	0	1	1	0	0	1	0	1	1	0	0	1	6.6	12.7	37.3	23.2	4.1	21	24	22	0.5	0.04	82	5.1	77	105	161
217	female	37	160.5	47.3	18.3616	0	0	0	0	0	0	0	0	0	0	0	0	0	0	0	0	0	0	0	0	0	0	1	0	1	0	0	1	0	4.9	8.2	26.2	34.1	4	50	57	39	0.63	0.03	77	5.6	68	84	36
218	female	27	170	53	18.3391	0	0	0	0	0	0	0	0	0	0	0	0	0	0	0	0	0	1	0	1	0	1	0	0	0	0	1	0	1	5.9	12.7	35.7	20.5	3.6	17	12	7	0.71	0.03	66	5.5	75	82	81
219	female	28	157	45	18.2563	0	0	0	0	0	0	0	0	0	0	0	0	0	0	0	0	0	0	0	1	0	1	0	0	1	1	0	0	1	5.3	13.8	40.2	18.7	4.6	13	9	12	0.52	0.01	94	5.6	71	73	43
220	female	35	157	54	21.9076	0	0	0	0	0	0	0	0	0	0	0	0	0	0	0	0	0	0	0	0	0	0	1	0	0	1	0	0	0	8.4	15.1	43.4	23.6	4.7	21	17	20	0.58	0.06	78	5.3	67	117	49
221	male	25	165	54	19.8347	0	0	0	0	0	0	0	0	0	0	0	0	0	0	0	0	0	0	0	1	0	0	1	0	0	1	0	0	1	6.6	15.1	42	24.2	5.1	17	20	26	0.97	0.01	100	5.6	46	97	206
222	male	27	174	77	25.4327	0	0	0	0	0	0	0	0	0	0	0	0	0	0	0	0	0	0	0	0	0	0	1	0	1	1	0	0	1	6.5	15.5	43.4	26.4	4.8	31	49	113	0.88	0.19	96	5.6	51	156	178
223	male	26	176	54	17.4329	0	0	0	0	0	0	0	0	0	0	0	0	0	0	0	0	0	0	0	1	0	0	1	0	0	1	0	0	0	3.6	14.6	43.2	18.7	4.6	20	17	17	0.73	0.01	171	5.5	75	108	92
224	female	23	157	61	24.7475	0	0	0	0	0	0	0	0	0	0	0	0	0	0	0	0	0	0	0	0	0	0	1	0	0	1	0	0	1	6.1	12.8	37.3	28.8	4.5	15	10	13	0.63	0.01	84	5.6	65	143	49
225	female	24	161	48	18.5178	0	0	0	0	0	0	0	0	0	0	0	0	0	0	0	0	0	0	0	1	0	0	1	0	0	1	0	0	1	5.1	12.8	37.6	26.7	4.4	17	11	12	0.47	0.01	86	5.3	48	77	33
226	female	25	161	51	19.6752	0	1	0	0	0	0	0	0	0	0	0	0	0	0	0	0	0	0	0	1	0	0	1	0	0	1	0	0	1	4.5	13.6	39.8	24.6	4.6	21	14	12	0.52	0.01	89	5.4	87	89	71
227	male	42	178	70	22.0932	0	0	0	0	0	0	0	0	0	0	0	0	0	0	0	0	0	0	0	0	0	0	1	0	0	1	0	0	0	5.7	14.4	42.1	25.5	5	17	13	17	0.75	0.02	118	5.6	53	71	40
228	female	25	165	52.5	19.2837	0	0	0	0	0	0	0	1	0	0	0	0	0	0	0	0	0	0	0	1	0	0	1	0	0	1	0	0	1	5.5	13.2	38.2	32.7	4.8	15	10	13	0.51	0.01	87	5.4	64	112	105
229	female	42	162	60	22.8624	0	0	0	0	0	0	0	0	0	0	0	0	0	0	0	0	0	0	0	1	0	0	1	0	0	0	1	0	1	4.6	9.2	29.1	26.1	3.3	23	17	25	0.62	0.02	86	5.4	87	65	46
230	male	43	164	65	24.1672	0	0	0	0	0	0	0	0	0	0	0	0	0	0	0	0	0	0	0	0	0	1	0	0	0	1	0	0	1	7.6	16.3	46.6	25.4	4.8	20	36	28	0.86	0.01	89	5.9	61	116	122
231	female	39	164	48	17.8465	0	0	0	0	0	0	0	0	0	0	0	0	0	0	0	0	0	0	0	1	0	0	0	1	0	1	0	0	0	4.2	13	37.8	27.2	4.6	15	9	19	0.61	0.02	144	5.4	103	113	44
232	female	33	155	46	19.1467	0	1	0	0	0	0	0	0	0	0	0	0	0	0	0	0	0	0	0	1	0	1	0	0	0	0	0	1	0	9	13.4	40.2	30.2	4.4	17	4	13	0.51	0.03	83	5.7	100	83	42
233	female	29	155	49	20.3954	0	0	0	0	0	0	0	0	0	0	0	0	0	0	0	0	0	0	0	1	0	1	0	0	1	0	1	0	0	7.2	13.2	39.8	26.9	4.4	18	21	19	0.51	0.01	86	5.3	80	114	55
234	male	68	171	63	21.5451	0	0	0	1	0	0	0	0	0	0	0	1	0	0	0	0	0	0	1	1	0	0	1	0	0	0	0	1	0	4.8	13.4	38.3	22	4.1	27	17	16	0.76	0.06	126	5.8	83	121	57
235	female	36	166	52	18.8707	0	0	0	0	0	0	0	0	0	0	0	0	0	0	0	0	0	1	0	1	0	0	1	0	0	1	0	0	0	5.6	13.4	38.6	18	4.4	13	8	16	0.62	0.02	90	5.3	57	114	85
236	male	34	168	64	22.6757	0	0	0	0	0	0	0	0	0	0	0	0	0	0	0	0	0	1	0	1	0	0	1	0	0	0	1	0	0	5.7	15.7	43.8	27.7	4.9	20	20	43	0.87	0.01	89	5.4	76	165	157
237	female	31	153	59	25.204	0	0	0	0	0	0	0	0	0	0	0	0	0	0	0	0	0	0	0	0	0	1	0	0	0	0	1	0	0	8.2	13.7	40	25.6	4.6	19	16	11	0.51	0.02	74	5.5	66	111	82
238	female	42	159	49	19.3821	0	1	0	0	0	0	0	0	0	0	0	0	0	0	0	0	0	0	1	0	0	0	0	1	0	1	0	0	0	5.2	12.5	37.7	32.5	4.6	15	11	8	0.66	0.02	86	5.3	65	100	50
239	female	42	154	43	18.1312	0	0	0	0	0	0	0	0	0	0	0	0	0	0	0	0	0	0	0	0	0	0	1	0	0	0	1	0	1	8	13.9	39.4	27.9	4.4	22	19	20	0.74	0.04	84	5.2	72	122	68
240	female	35	162	72	27.4348	0	0	0	0	0	0	0	0	0	0	0	0	0	0	0	0	0	0	0	0	0	0	1	0	1	0	0	1	0	7.5	13.8	40.3	24.5	4.6	23	23	19	0.65	0.03	74	5.6	58	115	62
241	female	42	155	60	24.974	0	0	0	0	0	0	0	0	0	0	0	0	0	0	0	0	0	1	0	1	0	0	1	0	0	1	0	0	1	11	15.3	45.7	36.6	4.4	16	6	16	0.62	0.23	89	5.9	49	241	135
242	male	38	176	116	37.4483	0	0	0	1	1	1	0	0	0	0	0	1	1	1	0	0	0	1	0	0	0	0	1	0	0	1	0	0	0	8.7	16.1	45.6	25.6	4.7	27	67	31	0.75	0.29	189	9.4	32	162	280
243	female	37	160	58	22.6562	0	0	0	0	0	0	0	0	0	0	0	0	0	0	0	0	0	0	0	0	0	0	1	0	0	1	0	0	0	5.1	14.4	41	21	4.2	15	9	9	0.52	0.03	117	5.3	74	173	94
244	female	49	158	48	19.2277	0	0	0	0	0	1	0	0	0	0	0	0	0	1	0	0	0	1	0	0	0	0	0	1	0	1	0	0	1	8.2	14.8	42.3	33.7	5.2	16	14	21	0.72	0.01	101	5.2	70	168	180
245	female	25	164	52	19.3337	0	0	0	0	0	0	0	0	0	0	0	0	0	0	0	0	0	0	0	0	0	0	1	0	1	1	0	0	1	5.6	13.8	40	24.6	5.2	15	14	14	0.5	0.01	92	5.4	56	108	46
246	female	34	167	58	20.7967	0	0	0	0	0	0	0	0	0	0	0	0	0	0	0	0	0	0	0	0	0	0	1	0	0	1	0	0	1	3.8	10	31.9	19	4.1	18	12	17	0.63	0.01	95	5.6	81	98	63
247	female	28	148	46	21.0007	0	0	0	0	0	0	0	0	0	0	0	0	0	0	0	0	0	0	0	0	0	0	1	0	0	1	0	0	1	8.4	12.8	36.9	30.7	4.2	16	11	13	0.6	0.06	92	5.3	60	99	31
248	female	43	158	53	21.2306	0	1	0	0	0	0	0	0	0	0	0	0	0	0	0	0	0	0	0	1	0	0	1	0	1	0	1	0	0	4	13.7	38.6	28.5	4.6	41	27	79	0.51	0.1	79	5.1	67	87	100
249	female	36	160	56	21.875	0	0	0	0	0	0	0	0	0	0	0	0	0	0	0	0	0	0	0	1	0	0	1	0	0	1	0	0	0	5.8	13.2	39	29.8	4.3	16	9	9	0.58	0.03	84	5.6	61	114	58
250	female	25	153	77	32.8933	0	0	0	0	0	0	1	0	0	0	0	0	0	0	0	0	0	0	0	0	0	1	0	0	1	1	0	0	1	9.2	14.4	43	33.1	4.9	37	70	48	0.44	0.37	77	6	86	90	104
251	male	40	167	60	21.5139	0	0	0	0	0	0	0	0	0	0	0	0	0	0	0	0	0	0	1	1	0	0	1	0	0	1	0	0	1	4.3	16.3	46.5	31.8	4.9	17	21	23	0.74	0.01	99	5.6	67	140	74
252	female	33	160	44	17.1875	0	0	0	0	0	0	0	0	0	0	0	0	0	0	0	0	0	1	0	1	0	0	1	0	0	1	0	0	0	4.7	12.7	37.1	21.4	4.8	21	12	14	0.55	0.02	85	5.7	68	80	57
253	female	22	158	48	19.2277	0	0	0	0	0	0	0	0	0	0	0	0	0	0	0	0	0	0	0	1	0	0	1	0	0	1	0	0	1	7.8	13.9	39.4	19.3	4.5	13	9	12	0.52	0.03	112	5.4	64	96	48
254	female	44	158	60	24.0346	0	0	0	0	0	0	0	0	0	0	0	0	0	0	0	0	0	1	0	0	0	0	1	0	1	1	0	0	1	7.8	15.8	46.1	23.4	4.8	18	17	19	0.69	0.02	122	5.7	82	125	86
255	female	30	153	46	19.6506	0	1	0	0	0	0	0	0	0	0	0	0	0	0	0	0	0	0	0	1	0	0	1	0	1	1	0	0	0	8.6	12.9	36.7	24.9	4.6	19	16	14	0.6	0.02	85	5.5	53	71	47
256	female	35	165	53	19.4674	0	0	0	0	0	0	0	0	0	0	0	0	0	0	0	0	0	0	0	1	0	1	0	0	0	1	0	0	1	6.9	13.8	40.1	18.9	4.2	21	18	16	0.72	0.02	138	5.7	69	86	97
257	female	28	158	61	24.4352	0	0	0	0	0	0	0	0	0	0	0	0	0	0	0	0	0	0	0	0	0	0	1	0	0	0	1	0	1	6.2	12.8	38.1	45.1	4.1	57	22	7	0.57	0.15	86	5.6	65	74	51
258	female	38	146	46	21.58	0	0	0	0	0	0	0	0	0	0	0	0	0	0	0	0	0	0	0	0	0	0	0	1	0	1	0	0	1	6.3	13.5	40.7	23	4.5	18	11	9	0.58	0.02	71	5.7	65	118	45
259	female	37	162	48	18.2899	0	0	0	0	0	0	0	0	0	0	0	0	0	0	0	0	0	0	0	0	0	0	1	0	0	1	0	0	1	5.6	10.4	33	22.7	4.5	22	15	11	0.57	0.04	86	6	69	112	85
260	female	23	149	40	18.0172	0	0	0	0	0	0	0	0	0	0	0	0	0	0	0	0	0	0	0	1	0	0	1	0	0	1	0	0	0	5.4	11.9	35.2	23.5	4.3	20	6	9	0.65	0.03	69	5.2	67	140	61
261	female	23	157	55	22.3133	0	1	0	0	0	0	0	0	0	0	0	0	0	0	0	0	0	0	0	0	0	0	1	0	1	1	0	0	1	6.8	14.1	42.6	37.5	4.9	13	12	14	0.61	0.01	84	5.3	49	131	86
262	female	23	160	55	21.4844	0	0	0	0	0	0	0	0	0	0	0	0	0	0	0	0	0	1	0	1	0	0	1	0	1	1	0	0	1	7.7	14.4	41	23.9	4.7	13	11	16	0.59	0.04	85	5.2	66	91	49
263	male	24	175	108	35.2653	0	0	0	0	0	0	0	0	0	0	0	0	0	0	0	0	0	0	0	1	0	0	1	0	0	0	1	0	0	11	15.4	45.5	36.7	4.7	24	33	40	0.67	0.65	86	6.1	33	125	670
264	female	23	162	45	17.1468	0	0	0	0	0	0	0	0	0	0	0	0	0	0	0	0	0	0	0	0	0	0	1	0	0	1	0	0	1	7.1	14.2	40.6	26.7	4.8	20	12	14	0.53	0.03	81	5.5	69	104	62
265	male	31	173	60	20.0474	0	0	0	0	0	0	0	0	0	0	0	0	0	0	0	0	0	1	0	1	0	0	1	0	1	1	0	0	1	4.1	14.3	40.4	20.6	4.9	17	14	16	0.72	0.01	83	5.4	61	76	51
266	female	31	155	53	22.0604	0	0	0	0	0	0	0	0	1	0	0	0	0	0	0	0	0	0	0	0	0	0	1	0	0	1	0	0	1	8.2	14.7	42.7	30.9	5.3	16	11	17	0.53	0.08	79	5.2	67	123	90
267	female	27	158	48	19.2277	0	0	0	0	0	0	0	0	0	0	0	0	0	0	0	0	0	0	0	1	0	1	0	0	1	0	0	1	0	4.9	13.1	38.5	24.9	3.8	21	14	11	0.7	0.06	91	5.7	129	67	45
268	female	29	165	59	21.6713	0	0	0	0	0	0	0	0	0	0	0	0	0	0	0	0	0	0	0	0	0	0	1	0	0	1	0	0	0	5.6	13.9	38.8	22.8	4.3	20	11	7	0.62	0.03	84	5.3	85	87	69
269	female	29	158	50	20.0288	0	0	0	0	0	0	0	0	0	0	0	0	0	0	0	0	0	0	0	0	0	0	1	0	0	0	1	0	1	4.9	12.6	37.7	18.4	3.9	19	16	16	0.67	0.01	90	5.7	81	88	32
270	female	36	161	54	20.8325	0	0	0	0	0	0	0	0	0	0	0	0	0	0	0	0	0	1	0	0	0	0	1	0	1	1	0	0	1	8.2	12.4	36.2	36.9	4.3	20	11	12	0.57	0.01	85	5.8	99	94	73
271	female	25	154	61	25.721	0	0	0	0	0	0	0	0	0	0	0	0	0	0	0	0	0	0	0	1	0	0	1	0	1	1	0	0	1	6.4	13.9	40.3	24.4	4.6	14	10	11	0.59	0.07	113	5.2	56	103	104
272	female	36	154	50	21.0828	0	0	0	0	0	0	0	0	0	0	0	0	0	0	0	0	0	1	0	0	0	1	0	0	1	1	0	0	1	7.3	12.9	36.9	31.8	3.7	16	13	14	0.56	0.02	89	5.6	53	88	35
273	female	31	168	61	21.6128	0	0	0	0	0	0	0	0	0	0	0	0	0	0	0	0	0	0	0	0	0	0	1	0	0	1	0	0	0	6.5	13.2	38.6	18.8	4.8	21	40	21	0.53	0.01	98	5.5	69	91	35
274	female	43	156	47	19.313	0	0	0	0	0	0	0	0	0	0	0	0	0	0	0	0	0	1	0	1	0	0	1	0	0	1	0	0	1	6.1	12.4	36.8	22.8	3.8	39	34	75	0.62	0.02	90	5.3	87	47	57
275	female	28	157	62	25.1532	0	0	0	0	0	0	0	0	0	0	0	0	0	0	0	0	0	0	0	0	0	1	0	0	0	1	0	0	1	8.1	13.6	40.4	28.3	4.3	13	10	10	0.65	0.05	87	5.3	67	102	60
276	female	22	161	48	18.5178	0	0	0	0	0	0	0	0	0	0	0	0	0	0	0	0	0	0	0	0	0	0	0	1	0	1	0	0	1	6.8	12.9	37.5	28.1	4.5	16	20	25	0.51	0.02	111	5.8	56	93	41
277	female	21	165	45	16.5289	0	0	0	0	0	0	0	0	0	0	0	0	0	0	0	0	0	0	0	1	0	0	1	0	1	1	0	0	1	10.7	15.2	42	22.7	4.5	16	13	24	0.49	0.01	96	5.4	68	103	67
278	male	23	182	108	32.6048	0	1	0	0	0	0	0	0	0	0	0	0	0	0	0	0	0	0	0	1	0	0	1	0	0	0	1	0	0	8.5	15.6	43	21.8	5	36	64	30	0.87	0.4	96	5.4	53	117	170
279	male	30	174	73	24.1115	0	0	0	0	0	0	0	0	0	0	0	0	0	0	0	0	0	0	0	0	0	0	1	0	0	1	0	0	1	6.6	16.1	44.6	24.5	4.6	17	16	15	0.82	0.02	103	5.7	62	97	88
280	female	24	157	43	17.4449	0	0	0	0	0	0	0	0	0	0	0	0	0	0	0	0	0	0	0	0	0	0	0	1	0	1	0	0	0	5.8	13.5	39.1	21.6	4.7	21	26	15	0.61	0.01	98	5.5	65	86	49
281	female	23	162	52	19.8141	0	0	0	0	0	0	0	0	0	0	0	0	0	0	0	0	0	0	0	1	0	0	1	0	0	1	0	0	0	6.1	13	36.3	31.7	4.4	14	10	11	0.67	0.01	104	5.6	47	89	45
282	female	24	155	45	18.7305	0	0	0	0	0	0	0	0	0	0	0	0	0	0	0	0	0	0	0	1	0	0	1	0	0	1	0	0	0	7.4	14.8	42	26.1	4.6	17	13	13	0.78	0.02	137	5.4	82	66	70
283	female	24	160	52	20.3125	0	1	0	0	0	0	0	0	0	0	0	0	0	0	0	0	0	0	0	1	0	0	1	0	0	1	0	0	0	6.4	12.8	36.8	19.5	4.4	18	16	15	0.58	0.03	90	5.6	66	97	63
284	male	24	169	88	30.8112	0	0	0	0	0	0	0	0	0	0	0	0	0	0	0	0	0	0	0	1	0	0	1	0	0	0	1	0	0	6	15.7	43.3	22.2	5.3	34	68	54	0.84	0.04	96	5.8	60	101	187
285	male	32	171	63	21.5451	0	0	0	0	0	0	0	0	0	0	0	0	0	0	0	0	0	0	0	1	0	1	0	0	0	0	1	0	1	4.5	16.1	46.8	18.7	4.4	19	18	12	1.2	0.02	87	5.9	57	145	54
286	female	35	156.5	45.2	18.4548	0	0	0	0	0	0	0	0	0	0	0	0	0	0	0	0	0	0	0	0	0	0	1	0	0	1	0	0	1	10.6	12.6	36.1	22	4	18	10	10	0.43	0.05	132	5.2	55	51	137
287	male	46	160	76	29.6875	0	0	0	1	0	0	0	0	0	0	0	0	0	0	0	0	0	0	0	0	0	0	1	0	1	1	0	0	1	8.4	17	47.1	26	4.5	22	38	35	0.75	0.11	81	5.8	52	158	203
288	male	34	168	81	28.699	0	0	0	0	0	0	0	0	0	0	0	0	0	0	0	0	0	0	1	1	0	1	0	0	1	1	0	0	1	6.3	16.1	46.9	19	4.5	24	29	15	0.81	0.22	101	5.8	39	140	67
289	male	26	172	68	22.9854	0	0	0	0	0	0	0	0	0	0	0	0	0	0	0	0	0	0	0	1	0	0	1	0	1	1	0	0	1	6.5	15.9	44.1	23.3	5.1	27	46	12	0.76	0.03	90	5.1	61	110	79
290	female	25	163	45	16.937	0	0	0	0	0	0	0	0	0	0	0	0	0	0	0	0	0	0	0	1	0	0	1	0	0	1	0	0	1	5.4	13.5	39.7	13.6	5	15	11	9	0.58	0.01	87	5.4	87	161	35
291	female	35	151	48	21.0517	0	0	0	0	0	0	0	0	1	0	0	0	0	0	0	0	0	0	0	1	0	0	1	0	0	0	1	0	0	7.7	13.4	39.5	33	4.2	19	14	9	0.46	0.1	68	5.6	72	92	101
292	female	30	156	45.5	18.6966	0	0	0	0	0	0	0	0	0	0	0	0	0	0	0	0	0	0	0	1	0	0	1	0	1	1	0	0	1	6.3	13.2	37.9	24.9	4.6	20	13	8	0.63	0.02	108	5.7	92	55	44
293	female	30	160	69	26.9531	0	0	0	0	0	0	0	0	0	0	0	0	0	0	0	0	0	0	0	1	0	0	1	0	1	1	0	0	0	7.4	14.1	40.4	31.7	4.4	19	11	10	0.59	0.1	84	5.2	75	112	93
294	female	43	158	49	19.6283	0	0	0	0	0	0	0	0	0	0	0	0	0	0	0	0	0	1	0	1	0	0	1	0	0	1	0	0	1	7.1	13.3	39.6	19.4	4	15	21	23	0.48	0.04	91	5.1	76	70	161
295	female	36	161	50	19.2894	0	0	0	0	0	0	0	0	0	0	0	0	0	0	0	0	0	0	0	1	0	0	1	0	0	0	1	0	0	5.2	13.4	39.9	23.9	4.8	19	13	23	0.5	0.01	67	5.6	72	137	68
296	female	29	166	85	30.8463	0	0	0	0	0	0	0	0	0	0	0	0	0	0	0	0	0	0	0	1	0	0	1	0	1	1	0	0	1	6.9	12.7	36.7	29.9	4.1	17	14	22	0.54	0.3	80	5.3	53	86	48
297	female	26	163	58	21.83	0	0	0	0	0	0	0	0	0	0	0	0	0	0	0	1	0	0	1	1	0	1	0	0	0	1	0	0	1	7.3	13.7	39.2	27.1	4.8	16	11	11	0.54	0.13	91	5.6	79	89	23
298	male	27	174	96	31.7083	0	0	0	0	0	0	0	0	0	0	0	0	0	0	0	0	0	1	0	1	0	0	1	0	0	0	0	1	1	8.2	15.8	45	24.2	4.7	15	17	23	0.96	0.03	90	5.4	67	124	73
299	male	57	176	75	24.2123	0	1	0	1	0	1	1	0	0	0	0	1	0	1	0	0	1	0	0	1	0	0	1	0	1	0	1	0	0	4.6	14.8	44.4	24.8	3.9	19	18	27	0.93	0.03	112	5.7	61	107	156
300	male	29	173	60	20.0474	0	0	0	0	0	0	0	0	0	0	0	0	0	0	0	0	0	1	0	1	0	0	1	0	1	1	0	0	0	6.2	15.7	43.7	18.4	5	23	25	23	0.92	0.02	101	5.6	95	98	54
301	female	47	152	45	19.4771	0	0	0	0	0	0	0	0	0	0	0	0	0	0	0	0	0	0	0	0	0	1	0	0	1	1	0	0	1	5.8	13.7	40.1	22.5	5	19	14	11	0.7	0.01	84	5.6	83	125	57
302	female	34	163	62	23.3355	0	0	0	0	0	0	0	0	0	0	0	0	0	0	0	0	0	0	0	1	0	0	1	0	0	1	0	0	1	6.1	14.5	42.9	23.9	4.8	16	17	15	0.5	0.03	85	5.6	64	103	66
303	female	29	154	52	21.9261	0	1	0	0	0	0	0	0	0	0	0	0	0	0	0	0	0	0	0	1	0	0	1	0	0	0	0	1	0	8	13.4	38.2	22.9	4.5	20	13	15	0.56	0.38	84	5.5	66	105	67
304	female	25	161	68	26.2336	0	0	0	0	0	0	0	0	0	0	0	0	0	0	0	0	0	0	0	1	0	1	0	0	0	0	1	0	0	5.9	13.1	36.8	22	4.2	14	24	23	0.54	0.02	91	5.6	54	127	52
305	female	29	163	52	19.5717	0	0	0	0	0	0	0	0	0	0	0	0	0	0	0	0	0	0	0	0	0	0	1	0	0	1	0	0	1	6.7	13.1	38.6	27.7	4.8	13	8	10	0.51	0.01	90	5.5	94	85	40
306	female	24	170	65	22.4913	0	0	0	0	0	0	0	0	0	0	0	0	0	0	0	0	0	0	0	0	0	0	1	0	0	1	0	0	0	9.4	14.9	42.3	37	4.6	18	16	18	0.69	0.06	93	5.5	59	139	151
307	female	23	157	58	23.5304	0	1	0	0	0	0	0	0	0	0	0	0	0	0	0	0	0	1	0	1	0	0	1	0	1	1	0	0	0	6.3	12.9	36.7	30.1	4.7	15	11	11	0.58	0.02	92	5.7	51	96	109
308	female	35	163	47	17.6898	0	0	0	0	0	0	0	0	0	0	0	0	0	0	0	0	0	0	0	0	0	0	1	0	0	1	0	0	1	5.1	11.6	36.1	30.3	4.1	17	15	13	0.7	0.02	77	6.1	67	103	54
309	female	23	158	58	23.2335	0	0	0	0	0	0	0	0	0	0	0	0	0	0	0	0	0	0	0	1	0	0	1	0	0	1	0	0	0	5	13.8	38.2	18.6	4.7	15	15	9	0.72	0.02	91	5.3	70	75	58
310	female	23	151	44	19.2974	0	0	0	0	0	0	0	0	0	0	0	0	0	0	0	0	0	0	0	1	0	0	1	0	0	1	0	0	0	4.3	12.1	35.3	28.7	4.6	19	12	11	0.69	0.01	90	5.6	77	115	72
311	female	23	160	50	19.5312	0	0	0	0	0	0	0	0	0	0	0	0	0	0	0	0	0	0	0	1	0	0	1	0	0	1	0	0	1	9.8	13	37.1	24.1	4.7	16	10	15	0.63	0.01	93	5.5	59	71	111
312	female	25	157.2	44	17.8052	0	0	0	0	0	0	0	0	0	0	0	0	0	0	0	0	0	0	0	0	0	0	1	0	0	1	0	0	0	8.5	12.5	37.3	23.3	4.4	16	13	13	0.64	0.03	94	5.6	81	127	47
313	female	42	161	53	20.4467	0	0	0	0	0	0	0	0	0	0	0	0	0	0	0	0	0	0	1	0	0	0	1	0	1	1	0	0	1	5.3	13.3	38.1	26.5	4.4	13	9	11	0.84	0.04	85	5.3	76	102	69
314	female	46	157	48	19.4734	0	0	0	0	0	0	0	0	0	0	0	0	0	0	0	0	0	0	1	1	0	0	1	0	1	0	1	0	1	6.6	14.2	41	36.5	4.7	15	13	12	0.59	0.01	86	5.6	79	100	60
315	female	30	160	62	24.2188	0	0	0	0	0	0	0	0	0	0	0	0	0	0	0	0	0	0	0	1	0	0	1	0	0	1	0	0	1	7.3	13.4	39.8	35.5	4.5	21	20	19	0.63	0.22	77	5.7	71	108	64
316	female	22	154	42	17.7096	0	0	0	0	0	0	0	0	0	0	0	0	0	0	0	0	0	0	0	1	0	0	1	0	1	0	1	0	0	5.6	14.2	40.1	30.9	4.8	20	13	18	0.61	0.01	87	5.2	62	102	57
317	female	38	157	45	18.2563	0	0	0	0	0	0	0	0	0	0	0	0	0	0	0	0	0	0	0	1	0	0	1	0	1	1	0	0	1	8.6	13.5	39.5	27.8	5	27	25	31	0.71	0.02	88	5.4	92	105	47
318	female	42	165	64	23.5078	0	0	0	0	0	0	0	0	0	0	0	0	0	0	0	0	0	0	0	1	0	1	0	0	1	0	0	1	0	6.5	13.9	39.7	30.5	4.8	20	17	24	0.78	0.02	84	5.9	81	108	48
319	female	30	153	51	21.7865	0	0	0	0	0	0	0	0	0	0	0	0	0	0	0	0	0	1	0	1	0	0	1	0	0	0	1	0	1	9.6	13.2	38.4	21.9	4.7	19	13	11	0.57	0.02	84	5.1	101	69	35
320	female	42	156	53	21.7784	0	0	0	0	0	0	0	0	0	0	0	0	0	0	0	0	0	0	0	1	0	1	0	0	0	0	0	1	0	5.5	14	39.8	31.4	4.4	20	19	16	0.82	0.02	87	5.5	72	126	78
321	female	24	150	43	19.1111	0	1	0	0	0	0	0	0	0	0	0	0	0	0	0	0	0	0	1	1	0	0	1	0	0	0	1	0	0	10.7	13.6	38.8	27.6	4.6	17	11	13	0.63	0.02	119	5.3	68	104	79
322	female	49	155	53	22.0604	0	0	0	0	0	0	0	0	0	0	0	0	0	0	0	0	0	0	1	0	0	0	1	0	0	1	0	0	0	7.2	14.6	41	30.8	4.7	18	16	14	0.56	0.03	108	5.4	64	139	199
323	female	24	157	45	18.2563	0	0	0	0	0	0	0	0	0	0	0	0	0	0	0	0	0	0	0	0	0	0	1	0	0	1	0	0	1	6.9	13.6	39.2	28.9	4.4	17	11	9	0.6	0.19	78	5.6	58	105	105
324	male	26	178	82	25.8806	0	0	0	0	0	0	0	0	0	0	0	0	0	0	0	0	0	0	0	0	0	0	1	0	1	1	0	0	0	5.4	14.9	41.3	33.6	5.1	22	32	79	0.86	0.03	96	5.6	66	139	49
325	male	42	180	90	27.7778	0	0	1	0	0	0	0	0	0	0	0	0	0	0	0	0	0	0	1	1	0	0	1	0	0	1	0	0	0	6.9	14.1	42.1	37.3	4.9	21	25	33	0.78	0.14	87	5.6	46	111	85
326	female	22	151	47	20.6131	0	0	0	0	0	0	0	0	0	0	0	0	0	0	0	0	0	0	0	1	0	0	1	0	0	0	1	0	0	5	12.5	35.2	22.4	4.7	16	11	13	0.49	0.02	109	5.4	68	97	48
327	female	22	151	54	23.6832	0	0	0	0	0	0	0	0	0	0	0	0	0	0	0	0	0	0	0	0	0	0	0	1	0	1	0	0	0	6	13.5	39.3	28.4	5	24	18	12	0.67	0.03	86	5.1	80	92	25
328	male	67	163	78	29.3575	0	0	0	0	0	0	0	0	1	0	0	1	0	0	0	0	0	0	1	1	0	0	1	0	0	0	1	0	0	7	15.5	42.2	26.9	4.4	30	46	33	0.84	0.11	153	5.7	49	112	89
329	female	23	165	65	23.8751	0	0	0	0	0	0	0	0	0	0	0	0	0	0	0	0	0	0	0	0	0	0	1	0	1	1	0	0	1	6.3	13.4	39	29.3	4.9	16	13	11	0.7	0.01	97	5.4	94	107	61
330	female	49	158	58	23.2335	0	0	0	0	0	0	0	1	0	0	0	0	0	0	0	0	0	0	1	1	0	0	1	0	1	1	0	0	1	7.1	12.8	38.2	24.3	4.6	19	17	13	0.57	0.01	87	5.7	61	107	36
331	female	31	154	52	21.9261	0	0	0	0	0	0	0	0	0	0	0	0	0	0	0	0	0	0	1	1	0	0	1	0	1	1	0	0	0	5.9	13	39.2	25.1	4	17	10	18	0.68	0.03	100	5.7	66	66	113
332	male	24	160	60	23.4375	0	0	0	0	0	0	0	0	0	0	0	0	0	0	0	0	0	1	0	1	0	0	1	0	1	1	0	0	1	5.1	10.4	30.6	41.4	4.5	19	17	25	0.82	0.08	87	5.3	68	111	87
333	female	29	158	50	20.0288	0	0	0	0	0	0	0	0	0	0	0	0	0	0	0	0	0	0	0	1	0	0	1	0	0	1	0	0	1	5.5	11.4	35	29.4	4.4	12	9	14	0.54	0.03	141	5.6	72	92	60
334	female	40	163	54	20.3244	0	0	0	0	0	0	0	0	0	0	1	0	0	0	0	0	0	0	1	0	0	1	0	0	1	0	1	0	0	4.8	14.6	42.2	32.2	4.9	21	21	31	0.64	0.03	91	5.4	71	124	48
335	female	28	164	52	19.3337	0	0	0	0	0	0	0	0	0	0	0	0	0	0	0	0	0	1	0	1	0	0	1	0	1	1	0	0	0	4.8	13.8	39.4	23.7	4.2	16	14	12	0.49	0.02	85	5.2	65	128	69
336	female	46	167	59	21.1553	0	0	0	0	0	0	0	0	0	0	0	0	0	0	0	0	0	0	0	1	0	0	1	0	0	1	0	0	0	6.2	13.2	38.1	21.2	4.5	15	11	10	0.59	0.02	91	5.3	62	111	49
337	male	26	183	80	23.8884	0	0	0	0	0	0	0	0	0	0	0	0	0	0	0	0	0	0	1	1	0	0	1	0	1	1	0	0	0	5.1	15.3	43.1	22.5	4.7	31	34	19	0.79	0.03	86	5.5	59	68	67
338	male	34	175	79	25.7959	0	1	0	0	0	0	0	0	0	0	0	0	0	0	0	0	0	0	1	1	0	0	1	0	1	1	0	0	1	9.4	15.4	42	21.6	4.8	15	17	25	0.91	0.08	94	5.6	56	86	94
339	male	24	172	65	21.9713	0	0	0	0	0	0	0	0	0	0	0	0	0	0	0	0	0	0	0	1	0	1	0	0	0	0	1	0	0	6.3	15.5	44.5	25.3	5.2	17	16	19	0.71	0.02	94	5.5	60	136	51
340	female	30	168	57	20.1956	0	0	0	0	0	0	0	0	0	0	0	0	0	0	0	0	0	0	0	1	0	0	1	0	0	1	0	0	0	4.3	13.3	40.1	27	4	16	13	24	0.64	0.06	111	5.7	90	73	146
341	female	30	156	45	18.4911	0	1	0	0	0	0	0	0	0	0	0	0	0	0	0	0	0	0	0	0	0	1	0	0	1	1	0	0	1	4	12.3	36.8	29.1	4.9	18	10	14	0.44	0.01	94	5.5	101	75	51
342	female	21	150	75	33.3333	0	0	0	0	0	0	0	0	0	0	0	0	0	0	0	0	0	0	0	1	0	0	1	0	1	0	1	0	0	11.7	15.3	44.1	27.4	4.5	13	11	17	0.52	0.22	89	5.7	46	116	170
343	male	37	170	68	23.5294	0	0	0	0	0	0	0	0	0	0	0	0	0	0	0	0	0	0	0	0	0	0	1	0	1	1	0	0	0	7.6	15.5	47.3	38.3	4.7	23	29	28	0.9	0.06	95	5.6	56	143	100
344	female	24	164	57	21.1927	0	0	0	0	0	0	0	0	0	0	0	0	0	0	0	0	0	0	0	1	0	0	1	0	0	1	0	0	0	5.8	13.3	38.7	27.7	4.7	15	7	13	0.56	0.17	87	5.5	75	133	48
345	female	24	161	51	19.6752	0	0	0	0	0	0	0	0	0	0	0	0	0	0	0	0	0	0	0	0	0	0	1	0	0	1	0	0	0	8.3	13.8	41	23.8	4.6	16	10	16	0.67	0.06	72	5.3	70	103	121
346	female	24	165	53	19.4674	0	1	0	0	0	0	0	0	0	0	0	0	0	0	0	0	0	0	0	1	0	0	1	0	0	1	0	0	0	7.6	13.5	41	24.6	4.6	15	14	15	0.76	0.05	94	5.4	57	103	63
347	male	22	170	63	21.7993	0	0	0	0	0	0	0	0	0	0	0	0	0	0	0	0	0	0	0	1	0	0	1	0	0	1	0	0	0	6.7	15.7	45.6	19.4	4.8	28	45	25	0.84	0.01	91	4.9	45	84	54
348	male	22	173	64	21.3839	0	0	0	0	0	0	0	0	0	0	0	0	0	0	0	0	0	0	0	1	0	0	1	0	0	1	0	0	0	4.6	15.9	47.5	25.1	5.3	17	25	18	0.79	0.01	78	5.2	70	114	47
349	male	21	170	80	27.6817	0	0	0	0	0	0	0	0	0	0	0	0	0	0	0	0	0	1	0	0	0	0	1	0	0	1	0	0	1	8.1	15.7	45.2	22.1	4.3	21	48	57	0.82	0.08	107	5.2	33	113	399
350	female	25	158	60	24.0346	0	0	0	0	0	0	0	0	0	0	0	0	0	0	0	0	0	0	0	0	0	0	1	0	0	1	0	0	1	5.8	13.9	42	28.9	4.4	20	17	12	0.74	1.91	81	5.2	85	107	82
351	female	21	156	46	18.902	0	0	0	0	0	0	0	0	0	0	0	0	0	0	0	0	0	0	0	1	0	0	1	0	0	1	0	0	1	5.6	13.7	40.7	27.2	4.7	15	8	12	0.53	0.01	83	5.3	81	112	38
352	male	27	169	73	25.5593	0	0	0	0	0	0	0	0	0	0	0	0	0	0	0	0	0	1	0	1	0	1	0	0	0	0	1	0	0	6.9	15.1	44.1	24.2	5.2	24	43	46	0.77	0.1	98	5.2	47	93	256
353	female	31	160	45	17.5781	0	0	0	0	0	0	0	0	0	0	0	0	0	0	0	0	0	0	0	1	0	0	1	0	1	1	0	0	1	6.5	14.7	43.1	34.8	4.8	17	9	19	0.56	0.03	96	4.9	89	121	45
354	male	32	169	70	24.5089	0	0	0	0	0	0	0	0	0	0	0	0	0	0	0	0	0	0	1	1	0	1	0	0	0	1	0	0	1	7.3	15.5	45.7	31	4.7	24	45	32	0.71	0.04	91	5.3	84	97	131
355	female	23	155	52	21.6441	0	0	0	0	0	0	0	0	0	0	0	0	0	0	0	0	0	0	0	0	0	0	1	0	0	1	0	0	1	6.5	12.8	38.1	24.6	5	19	28	11	0.51	0.01	88	5.1	70	129	66
356	male	37	170	72	24.9135	0	0	0	0	0	0	0	0	0	0	0	0	0	0	0	0	0	0	1	1	0	0	0	1	1	0	1	0	1	9.2	16.3	48	31.5	4.8	24	29	71	0.74	0.04	72	5.1	58	221	200
357	female	21	150	58	25.7778	0	1	0	0	0	0	0	0	0	0	0	0	0	0	0	0	0	0	0	0	0	0	1	0	1	1	0	0	0	7.1	13.7	41	31.5	4.5	15	17	18	0.47	0.22	75	5.1	59	200	80
358	female	35	156	45	18.4911	0	0	0	0	0	0	0	0	0	0	0	0	0	0	0	0	0	0	0	1	0	0	1	0	1	1	0	0	0	6.2	14.3	42.5	25.8	4.7	22	32	19	0.67	0.01	65	5.2	72	108	94
359	female	33	157	46	18.662	0	0	0	0	0	0	0	0	0	0	0	0	0	0	0	0	0	0	0	0	0	0	1	0	1	1	0	0	0	10	13.3	39.9	25.6	5	18	15	12	0.52	0.01	87	5.5	61	125	98
360	female	45	160	55	21.4844	0	0	0	1	0	0	0	0	0	0	0	1	0	0	0	0	0	0	1	1	0	0	1	0	0	0	1	0	0	4.8	11.5	36.4	25.9	4.3	16	12	17	0.53	0.02	92	5.3	85	105	49
361	female	22	156	56	23.0112	0	0	0	0	0	0	0	0	0	0	0	0	0	0	0	0	0	0	0	1	0	0	1	0	0	1	0	0	1	8.3	12.7	38	33.1	4.4	17	12	21	0.43	0.05	89	4.8	73	71	53
362	male	30	171	57	19.4932	0	0	0	0	0	0	0	0	0	0	0	0	0	0	0	0	0	0	0	1	0	0	1	0	0	0	1	0	0	4.4	14.2	42.7	23.2	5	13	9	14	0.78	0.01	108	4.8	53	91	61
363	female	26	157	53	21.5019	0	0	0	0	0	0	0	0	0	0	0	0	0	0	0	0	0	0	1	1	0	0	1	0	0	0	1	0	0	6.2	11.5	35.4	34.1	3.7	14	9	17	0.62	2.17	104	5.5	95	135	120
364	female	35	161	59	22.7615	0	0	0	0	0	0	0	0	0	0	0	0	0	0	0	0	0	0	0	0	0	1	0	0	1	0	1	0	0	4.5	12.4	37.6	24.4	4.7	11	7	9	0.53	0.05	92	5.6	71	121	40
365	female	31	160	52	20.3125	0	0	0	0	0	0	0	0	0	0	0	0	0	0	0	0	0	0	0	0	0	0	1	0	0	1	0	0	0	7.7	12.2	37.4	24.4	4.5	14	8	9	0.62	0.02	103	5.3	48	75	55
366	female	20	154	51	21.5045	0	0	0	0	0	0	0	0	0	0	0	0	0	0	0	0	0	0	0	1	0	0	1	0	0	1	0	0	1	7.6	14.2	41.8	24.1	5.1	17	13	19	0.55	0.02	90	5.1	68	103	92
367	male	21	180	76	23.4568	0	0	0	0	0	0	0	0	0	0	0	0	0	0	0	0	0	1	0	1	0	0	1	0	0	1	0	0	1	6.7	14.9	42.6	21.7	5	20	34	27	0.65	0.01	86	5	50	113	82
368	female	23	158	70	28.0404	0	0	1	0	0	0	0	0	0	0	0	0	0	0	0	0	0	0	0	0	0	0	1	0	0	0	1	0	0	9.1	12.7	40.3	32.6	4.5	11	7	15	0.52	0.05	92	5.6	63	119	58
369	female	21	152	45	19.4771	0	0	0	0	0	0	0	0	0	0	0	0	0	0	0	0	0	0	0	0	0	0	1	0	0	1	0	0	1	6.3	12.8	40	25.2	4.6	18	13	18	0.58	0.02	100	5.5	53	112	97
370	male	22	180	99	30.5556	0	0	0	1	0	0	0	0	0	0	0	0	0	0	0	0	0	0	0	1	0	0	1	0	0	1	0	0	1	7.8	16.5	47.8	26.4	5	20	20	27	0.72	0.03	76	4.9	38	159	239
371	female	21	158	51	20.4294	0	0	0	0	0	0	0	0	0	0	0	0	0	0	0	0	0	0	0	1	0	1	0	0	1	1	0	0	0	8	12.6	38.5	35.2	4.6	17	11	15	0.44	0.03	94	5	61	97	49
372	female	22	164	48	17.8465	0	0	0	0	0	0	0	0	0	0	0	0	0	0	0	0	0	0	0	1	0	0	1	0	1	1	0	0	1	6	13.6	39.4	27.9	4.6	16	13	12	0.7	0.01	79	5.3	61	126	73
373	female	29	159	55	21.7555	0	0	1	0	0	0	0	0	0	0	0	0	0	0	0	0	0	0	0	1	0	0	1	0	1	1	0	0	1	7.7	16.3	48.1	23.1	4.1	16	11	24	0.51	0.01	74	5	81	73	66
374	female	45	154	50	21.0828	0	0	0	0	0	0	1	0	0	0	0	0	0	0	0	0	0	0	1	0	0	0	1	0	0	1	0	0	1	7	13.9	41	30.9	4.9	23	10	15	0.7	0.08	103	5.3	75	107	75
[truncated: 16 more columns]
